# Supplementary material for: Asymmetric Michael addition reactions catalyzed by calix[4]thiourea cyclohexanediamine derivatives
Source: publisher site journal article supplement (doi:10.3762/bjoc.14.164), 2018-07-25
Supplement: Additional file 1 [file 1860-5397-14-164-S1.pdf]

## Supporting Information

for

### Asymmetric Michael addition reactions catalyzed by calix[4]thiourea cyclohexanediamine derivatives

Zheng-Yi Li<sup>1</sup>, Hong-Xiao Tong<sup>1</sup>, Yuan Chen<sup>1,2</sup>, Hong-Kui Su<sup>1</sup>, Tangxin Xiao<sup>\*1</sup>,  
Xiao-Qiang Sun<sup>1</sup>, and Leyong Wang<sup>\*1,2</sup>

Address: <sup>1</sup>Jiangsu Province Key Laboratory of Fine Petrochemical Engineering,  
School of Petrochemical Engineering, Changzhou University, Changzhou 213164,  
China and <sup>2</sup>Key Laboratory of Mesoscopic Chemistry of MOE, School of Chemistry  
and Chemical Engineering, Nanjing University, Nanjing 210023, China

Email: Tangxin Xiao - xiaotangxin@cczu.edu.cn; Leyong Wang- lywang@nju.edu.cn

\*Corresponding author

### Experimental procedures, characterization data for all compounds and copies of NMR spectra

|                                                            |     |
|------------------------------------------------------------|-----|
| 1. General.....                                            | S2  |
| 2. Synthesis of catalysts and characterization data .....  | S2  |
| 2.1 Synthesis of isothiocyanato-calix[4]arenes .....       | S2  |
| 2.2 Synthesis of catalyst <b>1</b> .....                   | S3  |
| 2.3 Synthesis of catalyst <b>2</b> and <b>3</b> .....      | S4  |
| 2.4 Synthesis of catalyst <b>4</b> .....                   | S5  |
| 3. Synthesis of substrates and characterization data ..... | S6  |
| 4. NMR spectra for catalysts and intermediates.....        | S11 |
| 5. NMR spectra for substrates.....                         | S17 |
| 6. HPLC chromatograms.....                                 | S28 |
| 7. References.....                                         | S39 |

## General

All chemicals were used as received without special purification unless stated otherwise. Analytical thin layer chromatography (TLC) was performed on precoated silica gel 60 F254 plates. Visualization on TLC was achieved by the use of UV light (254 nm).  $^1\text{H}$  and  $^{13}\text{C}$  NMR spectra were recorded on a Bruker 300 and 75 MHz NMR spectrometer using TMS as the internal standard. Melting points (mp) are determined with a MPA 100 apparatus and are not corrected. The ee values of products were determined by chiral-phase HPLC analysis. (1*R*, 2*R*)-*N,N'*-dimethylcyclohexane-1,2-diamine, (1*R*,2*R*)-*N*-Boc-cyclohexanediamine, **5a** and **5b** were prepared according to literature procedures [1,2].

## 2. Synthesis of catalysts and characterization data

### 2.1 Synthesis of isothiocyanato-calix[4]arenes

To a solution of **5a** or **5b** (1 equiv) in 20 mL DCM, NaOH (3 equiv or 6 equiv, respectively) was added and the resulting mixture was stirred at room temperature for 15 min. Next, phenyl chlorothionocarbonate (1 equiv or 2 equiv respectively) was added slowly in 5 min. After the reaction was complete, the reaction mixture was washed with 10% HCl and deionized water. The aqueous layer was extracted with DCM, the combined organic phase was dried over  $\text{MgSO}_4$  and concentrated to give the crude product, which was purified by flash chromatography on silica gel (eluent with ethyl acetate/hexane 1:100) to afford product **6a** or **6b**.

Compound **6a**. White solid; 71% yield; mp: 116-117 °C;  $^1\text{H}$  NMR (300 MHz,  $\text{CDCl}_3$ ):  $\delta$  (ppm) = 0.95-1.02 (m, 12H,  $\text{CH}_3$ ), 1.25-1.39 (m, 5H,  $\text{CH}_2$ ), 1.47-1.59 (m, 3H,  $\text{CH}_2$ ), 1.79-1.92 (m, 8H,  $\text{CH}_2$ ), 3.08 (d,  $J$  = 13.5 Hz, 2H,  $\text{ArCH}_2\text{Ar}$ ), 3.17 (d,  $J$  = 13.5 Hz, 2H,  $\text{ArCH}_2\text{Ar}$ ), 3.75-3.80 (m, 4H,  $\text{ArOCH}_2$ ), 3.87-4.03 (m, 4H,  $\text{ArOCH}_2$ ), 4.39 (d,  $J$  = 9.0 Hz, 2H,  $\text{ArCH}_2\text{Ar}$ ), 4.44 (d,  $J$  = 9.0 Hz, 2H,  $\text{ArCH}_2\text{Ar}$ ), 6.19 (s, 2H,  $\text{ArH}$ ), 6.42 (d,  $J$  = 7.5 Hz, 2H,  $\text{ArH}$ ), 6.46-6.52 (m, 1H,  $\text{ArH}$ ), 6.78-6.95 (m, 6H,  $\text{ArH}$ ).  $^{13}\text{C}$  NMR (75

MHz, CDCl<sub>3</sub>):  $\delta$  (ppm) = 13.9, 14.0, 14.1, 19.1, 19.4, 19.5, 30.8, 31.0, 32.1, 32.3, 32.4, 74.8, 74.9, 75.0, 77.2, 122.0, 122.2, 124.1, 124.9, 127.7, 128.4, 129.1, 134.0, 135.3, 136.0, 136.5, 155.4, 155.8, 157.3.

Compound **6b**. White solid; 75% yield; mp: 123–126 °C; <sup>1</sup>H NMR (300 MHz, CDCl<sub>3</sub>):  $\delta$  (ppm) = 0.95-1.02 (m, 12H, CH<sub>3</sub>), 1.34-1.41 (m, 4H, CH<sub>2</sub>), 1.47-1.54 (m, 4H, CH<sub>2</sub>), 1.81-1.92 (m, 8H, CH<sub>2</sub>), 3.11 (d, *J*=13.5 Hz, 4H, ArCH<sub>2</sub>Ar), 3.79-3.93 (m, 8H, ArOCH<sub>2</sub>), 4.40 (d, *J*= 13.2 Hz, 4H, ArCH<sub>2</sub>Ar), 6.38 (s, 4H, ArH), 6.72-6.80 (m, 6H, ArH). <sup>13</sup>C NMR (75 MHz, CDCl<sub>3</sub>):  $\delta$  (ppm) = 14.0, 14.1, 19.2, 19.4, 26.9, 29.7, 30.9, 32.1, 32.3, 75.0, 75.2, 77.2, 122.7, 124.7, 125.1, 128.7, 133.3, 134.8, 136.3, 155.6, 156.6.

## 2.2 Synthesis of catalyst **1**

To a solution of chiral (1*R*,2*R*)-*N*-Boc-cyclohexanediamine (0.21 mmol) in DCM (15 mL) was added **6a** (0.21 mmol). The reaction mixture was stirred for 0.5 h at room temperature. After removal of the solvent, the crude product was purified by flash chromatography on silica gel (eluent with ethyl acetate/hexane 1:4) to give Boc-protected product. Subsequently, CF<sub>3</sub>COOH (1 mL) and DCM (30 mL) were added, and the mixture was stirred at room temperature for 3 h. After the reaction was complete, the solvent was distilled off. Then, DCM (30 mL) and H<sub>2</sub>O (30 mL) were successively added, and 2.0 mol/L NaOH solution was added dropwise to adjust the pH to 8–9. The aqueous layer was extracted with DCM (3 × 20 mL), the combined organic phase was dried over MgSO<sub>4</sub> and concentrated to give the catalyst **1**.

Compound **1**. White solid; 89% yield; mp: 134-135 °C; [ $\alpha$ ]<sub>D</sub><sup>20</sup> -37.5° (*C* = 1.0, in CHCl<sub>3</sub>); <sup>1</sup>H NMR (300MHz, DMSO-*d*<sub>6</sub>):  $\delta$  = 0.95-1.01 (m, 12H, CH<sub>3</sub>), 1.22-1.53 (m, 14H, CH<sub>2</sub> + CHHCH<sub>2</sub>CH<sub>2</sub>CHH), 1.65-1.75 (m, 2H, CHHCH<sub>2</sub>CH<sub>2</sub>CHH), 1.82-2.02 (m, 10H, CH<sub>2</sub> + CHNH<sub>2</sub> + CHNH), 3.11-3.19 (m, 4H, ArCH<sub>2</sub>Ar), 3.79-3.88 (m, 8H, ArOCH<sub>2</sub>), 4.33-4.37 (m, 4H, ArCH<sub>2</sub>Ar), 6.27-6.80 (m, 11H, ArH), 7.56 (d, 1H, *J* = 8.4 Hz, NH), 7.88 (s, 2H, NH<sub>2</sub>), 9.25 (s, 1H, NH). <sup>13</sup>C NMR (75MHz, DMSO-*d*<sub>6</sub>):  $\delta$  (ppm) = 14.3, 14.4, 19.3, 19.4, 23.7, 24.5, 29.9, 30.7, 31.4, 32.3, 53.5, 55.4, 74.8, 74.9, 75.0,

122.3, 128.2, 128.3, 128.5, 133.3, 134.6, 135.0, 135.2, 135.3, 154.6, 156.4, 156.6, 158.7, 159.2, 180.8. HR-ESI-MS ( $C_{51}H_{69}N_3O_4S$ ):  $m/z$  calcd for  $[M + H]^+ = 819.5009$ , found = 819.5013.

### 2.3 Synthesis of catalyst **2** and **3**

To a solution of chiral (1*R*,2*R*)-*N,N'*-dimethylcyclohexane-1,2-diamine (1.0 mmol) in DCM (15 mL) was added **6a** or **6b** (0.5 mmol). The reaction mixture was stirred for 0.5 h at room temperature. After removal of the solvent, the crude product was purified by flash chromatography on silica gel (eluent with  $CH_3OH/CH_2Cl_2$  1:25) to afford product **2** or **3**.

Compound **2**. White solid; 81% yield; mp: 92–93 °C;  $[\alpha]_D^{20}$  -38.5° ( $C = 1.0$ , in  $CHCl_3$ );  $^1H$  NMR (300MHz,  $DMSO-d_6$ ):  $\delta$  (ppm) = 0.95-0.99 (m, 12H,  $CH_3$ ), 1.15-1.23 (m, 4H,  $CH_2CH_2CH_2CH_2$ ), 1.34-1.73 (m, 12H,  $CH_2 + CH_2CH_2CH_2CH_2$ ), 1.80-1.93 (m, 10H,  $CH_2 + CHN(CH_3)_2 + CHNH$ ), 2.18 (s, 6H,  $N(CH_3)_2$ ), 3.09-3.19 (m, 4H,  $ArCH_2Ar$ ), 3.75-3.90 (m, 8H,  $ArOCH_2$ ), 4.29-4.36 (m, 4H,  $ArCH_2Ar$ ), 6.44-6.82 (m, 11H,  $ArH$ ), 7.13 (d, 1H,  $J = 6.6$  Hz,  $NH$ ), 9.11 (s, 1H,  $NH$ ).  $^{13}C$  NMR (75 MHz,  $DMSO-d_6$ ):  $\delta$  (ppm) = 14.3, 14.4, 19.3, 19.4, 21.8, 24.9, 25.1, 30.6, 32.2, 32.3, 32.8, 55.3, 65.8, 74.7, 74.8, 74.9, 122.3, 123.1, 123.4, 128.1, 128.2, 128.3, 128.6, 128.7, 134.3, 134.6, 134.7, 135.4, 135.5, 135.6, 153.5, 156.2, 156.8, 174.9. HR-ESI-MS ( $C_{53}H_{73}N_3O_4S$ ):  $m/z$  calcd for  $[M + H]^+ = 847.5322$ , found = 847.5320.

Compound **3**. White solid; 55% yield; mp: 142–144 °C;  $[\alpha]_D^{20}$  -36.5° ( $C = 1.0$ , in  $CHCl_3$ );  $^1H$  NMR (300 MHz,  $DMSO-d_6$ )  $\delta$  (ppm) = 0.95-1.40 (m, 28H,  $CH_3 + CH_2CH_2CH_2CH_2$ ), 1.48-1.97 (m, 18H,  $CH_2 + CHN(CH_3)_2$ ), 2.22 (s, 12H,  $N(CH_3)_2$ ), 3.12 (d, 4H,  $J = 12.6$  Hz,  $ArCH_2Ar$ ), 3.70-3.97 (m, 10H,  $CHNH + ArOCH_2$ ), 4.32 (d, 4H,  $J = 13.5$  Hz,  $ArCH_2Ar$ ), 6.36 (s, 5H,  $ArH$ ), 7.00-7.23 (m, 5H,  $ArH$ ), 9.32 (s, 2H,  $NH$ ).  $^{13}C$  NMR (75 MHz,  $CDCl_3$ ):  $\delta$  (ppm) = 14.0, 14.1, 19.2, 19.5, 22.0, 24.6, 25.1, 29.7, 31.0, 31.1, 32.1, 32.4, 32.8, 40.2, 55.9, 66.7, 74.9, 75.0, 77.2, 122.3, 124.1, 128.8, 128.9, 135.1, 135.2, 135.8, 153.9, 157.3, 179.8. HR-ESI-MS ( $C_{62}H_{90}N_6O_4S_2$ ):  $m/z$  calcd for  $[M + H]^+ = 1046.6465$ , found = 1046.6459.

## 2.4 Synthesis of catalyst 4

To a solution of 4-butoxyaniline (1.0 mmol) in 20 mL DCM, was added NaOH (4.5 mmol) and the resulting mixture was stirred at room temperature for 15 min. Next, phenyl chlorothionocarbonate was added slowly over 5 min. After the reaction was complete, the reaction mixture washed with 10% HCl (2 × 20 mL) and deionized water (2 × 20 mL). The aqueous layer was extracted with DCM (3 × 20 mL), the combined organic phase was dried over MgSO<sub>4</sub> and concentrated to give the crude product, which was purified by flash chromatography on silica gel (eluent with ethyl acetate/hexane 1:100) to afford 1-butoxy-4-isothiocyantobenzene. Then, 1-butoxy-4-isothiocyantobenzene (0.5 mmol) was added to a solution of chiral (1*R*,2*R*)-*N,N'*-dimethylcyclohexane-1,2-diamine (1.0 mmol) in DCM (15 mL). The reaction mixture was stirred for 0.5 h at room temperature. After removal of the solvent, the crude product was purified by flash chromatography on silica gel (eluent with CH<sub>3</sub>OH/CH<sub>2</sub>Cl<sub>2</sub> 1:20) to afford catalyst 4.

Compound 4. Yellow solid; 82% yield;  $[\alpha]_D^{20}$  -27.6° (*C* = 1.0, in CHCl<sub>3</sub>); <sup>1</sup>H NMR (300 MHz, DMSO-*d*<sub>6</sub>):  $\delta$  (ppm) = 0.93 (t, *J* = 7.5 Hz, 3H, CH<sub>3</sub>), 1.04-1.24 (m, 4H, CH<sub>2</sub>CH<sub>2</sub>CH<sub>2</sub>CH<sub>2</sub>), 1.37-1.49 (m, 2H, CH<sub>2</sub>), 1.55-1.78 (m, 5H, CH<sub>2</sub> + CH<sub>2</sub>CH<sub>2</sub>CH<sub>2</sub>CHH), 2.21-2.31 (m, 7H, N(CH<sub>3</sub>)<sub>2</sub> + CH<sub>2</sub>CH<sub>2</sub>CH<sub>2</sub>CHH), 2.42-2.50 (m, 1H, CHN(CH<sub>3</sub>)<sub>2</sub>), 3.91-4.05 (m, 3H, ArOCH<sub>2</sub> + CHNH), 6.85-6.89 (m, 2H, ArH), 7.21 (d, 1H, *J* = 6.9 Hz, NH), 7.26-7.29 (m, 2H, ArH), 9.35 (s, 1H, NH). <sup>13</sup>C NMR (75 MHz, DMSO-*d*<sub>6</sub>):  $\delta$  (ppm) = 14.2, 19.2, 22.0, 25.0, 25.2, 31.3, 31.7, 32.7, 40.2, 55.3, 65.7, 67.7, 114.8, 125.4, 132.3, 156.0, 179.8. HR-ESI-MS (C<sub>19</sub>H<sub>31</sub>N<sub>3</sub>OS): *m/z* calcd for [M + H]<sup>+</sup> = 349.2188, found = 349.2193.

## 3. Synthesis of substrates and characterization data

General procedure: To a stirred solution of the nitroalkene (0.5 mmol) and catalyst 2 (0.025 mmol, 5 mol %) in the mixed solvent of toluene (0.32 mL) and water (0.16 mL) was added acetylacetone (1 mmol). After the reaction was completed (monitored by TLC), the resulting mixture was concentrated and the residue was purified by flash

chromatography on silica gel (eluent with ethyl acetate/hexane 1:5 to 1:2) to afford the product. All products had NMR spectra in agreement with published data.

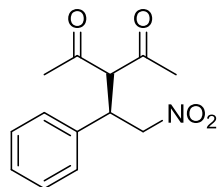

Compound **9a** [3]: (*R*)-3-(2-Nitro-1-phenylethyl)-pentane-2,4-dione

White solid; yield 99%; 94% *ee* determined by HPLC analysis (Daicel Chiralpak AS-H column, hexane/2-propanol = 85/15, flow rate: 1.0 mL/min, wavelength = 210 nm:  $t_R$  (minor) = 16.1 min,  $t_R$  (major) = 25.3 min).  $^1\text{H}$  NMR (300 MHz,  $\text{CDCl}_3$ )  $\delta$  (ppm) = 7.35-7.27 (m, 3H, CH), 7.20-7.17 (m, 2H, CH), 4.67-4.60 (m, 2H,  $\text{CH}_2$ ), 4.37 (d,  $J$  = 10.8 Hz, 1H, CH), 4.28-4.20 (m, 1H, CH), 2.28 (s, 3H,  $\text{CH}_3$ ), 1.94 (s, 3H,  $\text{CH}_3$ ).  $^{13}\text{C}$  NMR (75 MHz,  $\text{CDCl}_3$ )  $\delta$  (ppm) = 29.7, 30.5, 42.8, 70.6, 78.2, 128.0, 128.5, 129.3, 136.0, 201.1, 201.8.

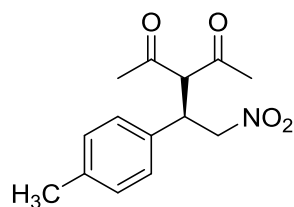

Compound **9b** [3]: (*R*)-3-(2-Nitro-1-(*p*-tolyl)ethyl)pentane-2,4-dione

White solid; yield 96%; 72% *ee* determined by HPLC analysis (Daicel Chiralpak AD-H column, hexane/2-propanol = 90/10, flow rate: 1.0 mL/min, wavelength = 210 nm:  $t_R$  (minor) = 10.9 min,  $t_R$  (major) = 17.3 min).  $^1\text{H}$  NMR (300 MHz,  $\text{CDCl}_3$ ): 7.14-7.05 (m, 4H, CH), 4.66-4.57 (m, 2H,  $\text{CH}_2$ ), 4.36 (d,  $J$  = 10.8 Hz, 1H, CH), 4.24-4.14 (m, 1H, CH), 2.29 (s, 6H,  $\text{CH}_3$ ), 1.94 (s, 3H,  $\text{CH}_3$ ) ppm.  $^{13}\text{C}$  NMR (75 MHz,  $\text{CDCl}_3$ )  $\delta$  (ppm) = 201.9, 201.2, 138.4, 132.8, 130.0, 127.8, 78.4, 70.8, 42.5, 30.5, 29.5, 21.1.

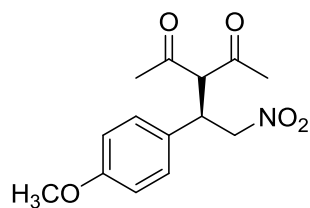

Compound **9c** [3]: (*R*)-3-[1-(4-Methoxyphenyl)-2-nitroethyl]pentane-2,4-dione

White solid; yield 97%; 46% *ee* determined by HPLC analysis (Daicel Chiralpak AD-H column, hexane/2-propanol = 90/10, flow rate: 1.0 mL/min, wavelength = 210 nm:  $t_R$  (minor) = 14.6 min,  $t_R$  (major) = 22.1 min).  $^1\text{H}$  NMR (300 MHz,  $\text{CDCl}_3$ ): 7.10 (d,  $J$  = 8.7 Hz, 2H, CH), 6.85 (d,  $J$  = 8.7 Hz, 2H, CH), 4.60-4.58 (m, 2H,  $\text{CH}_2$ ), 4.33 (d,  $J$  = 11.1 Hz, 1H, CH), 4.23-4.15 (m, 1H, CH), 3.78 (s, 3H,  $\text{OCH}_3$ ), 2.29 (s, 3H,  $\text{CH}_3$ ), 1.94 (s, 3H,  $\text{CH}_3$ ) ppm.  $^{13}\text{C}$  NMR (75 MHz,  $\text{CDCl}_3$ )  $\delta$  (ppm) = 201.9, 201.2, 159.5, 129.1, 127.6, 114.7, 77.4, 71.0, 55.2, 42.1, 30.4, 29.4.

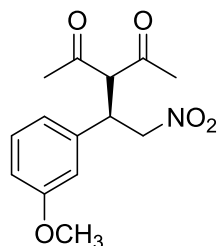

Compound **9d** [3]: (*R*)-3-[1-(3-Methoxyphenyl)-2-nitroethyl]pentane-2,4-dione

White solid; yield 99%; 63% *ee* determined by HPLC analysis (Daicel Chiralpak AD-H column, hexane/2-propanol = 85/15, flow rate: 1.0 mL/min, wavelength = 210 nm:  $t_R$  (minor) = 9.6 min,  $t_R$  (major) = 12.3 min).  $^1\text{H}$  NMR (300 MHz,  $\text{CDCl}_3$ ): 7.23 (d,  $J$  = 8.1 Hz, 1H, CH), 6.83-6.71 (m, 3H, CH), 4.64-4.61 (m, 2H,  $\text{CH}_2$ ), 4.37 (d,  $J$  = 10.8 Hz, 1H, CH), 4.25-4.20 (m, 1H, CH), 3.78 (s, 3H,  $\text{OCH}_3$ ), 2.30 (s, 3H,  $\text{CH}_3$ ), 1.97 (s, 3H,  $\text{CH}_3$ ) ppm.  $^{13}\text{C}$  NMR (75 MHz,  $\text{CDCl}_3$ )  $\delta$  (ppm) = 201.8, 201.0, 160.1, 137.6, 130.4, 119.9, 114.2, 113.6, 78.2, 70.6, 55.3, 42.8, 30.5, 29.6.

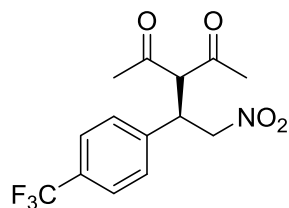

Compound **9e**[4]: (*R*)-3-[1-(4-Trifluoromethylphenyl)-2-nitroethyl]pentane-2,4-dione  
 Colorless oil; yield 99%; 76% *ee* determined by HPLC analysis (Daicel Chiralpak AD-H column, hexane/2-propanol = 90/10, flow rate: 1.0 mL/min, wavelength = 210 nm:  $t_R$  (minor) = 9.1 min,  $t_R$  (major) = 49.9 min).  $^1\text{H}$  NMR (300 MHz,  $\text{CDCl}_3$ ): 7.61 (d,  $J$  = 8.1 Hz, 2H, CH), 7.34 (d,  $J$  = 8.1 Hz, 2H, CH), 4.72-4.61 (m, 2H,  $\text{CH}_2$ ), 4.41-4.29 (m, 1H, CH), 2.32 (s, 3H,  $\text{CH}_3$ ), 2.00 (s, 3H,  $\text{CH}_3$ ) ppm.  $^{13}\text{C}$  NMR (75 MHz,  $\text{CDCl}_3$ )  $\delta$  (ppm) = 201.2, 200.4, 140.3, 131.0, 130.6, 128.5, 126.3, 77.7, 70.3, 42.4, 30.5, 29.8.

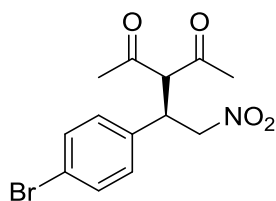

Compound **9f** [5]: (*R*)-3-[1-(4-Bromophenyl)-2-nitroethyl]pentane-2,4-dione  
 White solid; yield 93%; 64% *ee* determined by HPLC analysis (Daicel Chiralpak AD-H column, hexane/2-propanol = 85/15, flow rate: 0.7 mL/min, wavelength = 210 nm:  $t_R$  (minor) = 17.5 min,  $t_R$  (major) = 54.3 min).  $^1\text{H}$  NMR (300 MHz,  $\text{CDCl}_3$ ): 7.47 (d,  $J$  = 8.4 Hz, 2H, CH), 7.08 (d,  $J$  = 8.4 Hz, 2H, CH), 4.67-4.60 (m, 2H,  $\text{CH}_2$ ), 4.33 (d,  $J$  = 10.8 Hz, 1H, CH), 4.26-4.18 (m, 1H, CH), 2.30 (s, 3H,  $\text{CH}_3$ ), 1.98 (s, 3H,  $\text{CH}_3$ ) ppm.  $^{13}\text{C}$  NMR (75 MHz,  $\text{CDCl}_3$ )  $\delta$  (ppm) = 201.4, 200.6, 135.1, 132.5, 129.7, 122.7, 77.9, 70.4, 42.2, 30.5, 29.7.



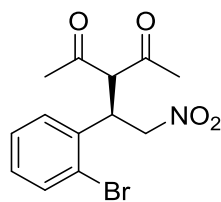

Compound **9g** [5]: (*R*)-3-[1-(2-Bromophenyl)-2-nitroethyl]pentane-2,4-dione

Orange solid; yield 95%; 70% *ee* determined by HPLC analysis (Daicel Chiralpak AD-H column, hexane/2-propanol = 98/2, flow rate: 0.7 mL/min, wavelength = 210 nm:  $t_R$  (minor) = 43.7 min,  $t_R$  (major) = 46.2 min).  $^1\text{H}$  NMR (300 MHz,  $\text{CDCl}_3$ ): 7.63 (d,  $J$  = 7.8 Hz, 1H, CH), 7.31-7.26 (m, 1H, CH), 7.20-7.13 (m, 2H, CH), 4.87-4.81 (m, 1H, CH), 4.78-4.65 (m, 2H,  $\text{CH}_2$ ), 4.60 (d,  $J$  = 9.3 Hz, 1H, CH), 2.28 (s, 3H,  $\text{CH}_3$ ), 2.05 (s, 3H,  $\text{CH}_3$ ) ppm.  $^{13}\text{C}$  NMR (75 MHz,  $\text{CDCl}_3$ )  $\delta$  (ppm) = 202.0, 200.9, 135.1, 134.0, 130.0, 128.3, 77.5, 69.1, 41.1, 31.0, 28.5.

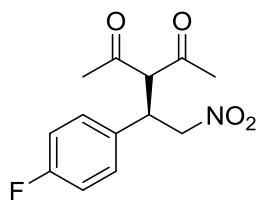

Compound **9h** [5]: (*R*)-3-[1-(4-Fluorophenyl)-2-nitroethyl]pentane-2,4-dione

Colorless oil; yield 90%; 68% *ee* determined by HPLC analysis (Daicel Chiralpak AD-H column, hexane/2-propanol = 90/10, flow rate: 0.7 mL/min, wavelength = 210 nm:  $t_R$  (minor) = 13.8 min,  $t_R$  (major) = 26.5 min).  $^1\text{H}$  NMR (300 MHz,  $\text{CDCl}_3$ ): 7.20-7.15 (m, 2H, CH), 7.06-6.99 (m, 2H, CH), 4.62-4.60 (m, 2H,  $\text{CH}_2$ ), 4.36-4.20 (m, 2H, CH), 2.28 (s, 3H,  $\text{CH}_3$ ), 1.96 (s, 3H,  $\text{CH}_3$ ) ppm.  $^{13}\text{C}$  NMR (75 MHz,  $\text{CDCl}_3$ )  $\delta$  (ppm) = 201.5, 200.8, 164.2, 160.9, 131.8, 130.0, 129.5, 116.5, 116.3, 78.2, 70.7, 42.0, 30.5, 29.6.

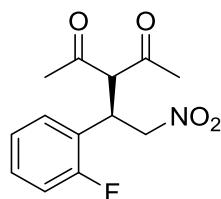

Compound **9i** [3]: (*R*)-3-[1-(2-Fluorophenyl)-2-nitroethyl]pentane-2,4-dione

Colorless oil; yield 91%; 59% *ee* determined by HPLC analysis (Daicel Chiralpak

AD-H column, hexane/2-propanol = 90/10, flow rate: 1.0 mL/min, wavelength = 210 nm:  $t_R$ (minor) = 10.5 min,  $t_R$  (major) = 12.0 min).  $^1\text{H}$  NMR (300 MHz,  $\text{CDCl}_3$ ): 7.33-7.26 (m, 1H, CH), 7.21-7.04 (m, 3H, CH), 4.80-4.61 (m, 2H,  $\text{CH}_2$ ), 4.53-4.43 (m, 2H, CH), 2.29 (s, 3H,  $\text{CH}_3$ ), 2.02 (s, 3H,  $\text{CH}_3$ ) ppm.  $^{13}\text{C}$  NMR (75 MHz,  $\text{CDCl}_3$ )  $\delta$  (ppm) = 201.9, 200.9, 133.8, 133.5, 130.7, 129.7, 129.0, 127.7, 77.5, 68.9, 38.9, 30.9, 28.6.

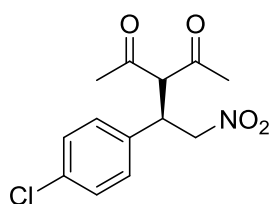

Compound **9j** [5]: (*R*)-3-[1-(4-Chlorophenyl)-2-nitroethyl]pentane-2,4-dione

White solid; yield 92%; 70% *ee* determined by HPLC analysis (Daicel Chiralpak AD-H column, hexane/2-propanol = 85/15, flow rate: 0.7 mL/min, wavelength = 210 nm:  $t_R$  (minor) = 16.4 min,  $t_R$  (major) = 42.0 min).  $^1\text{H}$  NMR (300 MHz,  $\text{CDCl}_3$ ): 7.31 (d,  $J$  = 8.4 Hz, 2H, CH), 7.14 (d,  $J$  = 8.4 Hz, 2H, CH), 4.63-4.60 (m, 2H,  $\text{CH}_2$ ), 4.34 (d,  $J$  = 10.5 Hz, 1H, CH), 4.27-4.19 (m, 1H, CH), 2.30 (s, 3H,  $\text{CH}_3$ ), 1.98 (s, 3H,  $\text{CH}_3$ ) ppm.  $^{13}\text{C}$  NMR (75 MHz,  $\text{CDCl}_3$ )  $\delta$  (ppm) = 201.4, 200.6, 134.6, 129.6, 129.3, 77.9, 70.5, 42.1, 30.5, 29.7.

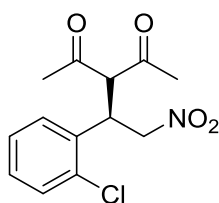

Compound **9k** [5]: (*R*)-3-[1-(2-Chlorophenyl)-2-nitroethyl]pentane-2,4-dione

White solid; yield 90%; 72% *ee* determined by HPLC analysis (Daicel Chiralpak AD-H column, hexane/2-propanol = 98/2, flow rate: 0.7 mL/min, wavelength = 210 nm:  $t_R$  (minor) = 30.3 min,  $t_R$  (major) = 32.8 min).  $^1\text{H}$  NMR (300 MHz,  $\text{CDCl}_3$ ): 7.45-7.40 (m, 1H, CH), 7.26-7.21 (m, 2H, CH), 7.19-7.15 (m, 1H, CH), 4.87-4.58 (m, 4H, CH +  $\text{CH}_2$ ), 2.28 (s, 3H,  $\text{CH}_3$ ), 2.04 (s, 3H,  $\text{CH}_3$ ) ppm.  $^{13}\text{C}$  NMR (75 MHz,  $\text{CDCl}_3$ )  $\delta$  (ppm) = 201.9, 200.9, 133.8, 133.5, 130.7, 129.7, 129.0, 127.7, 77.5, 68.9, 38.9, 30.9, 28.6.

## 4. NMR spectra for catalysts and intermediates

$^1\text{H}$  NMR spectrum of **6a**

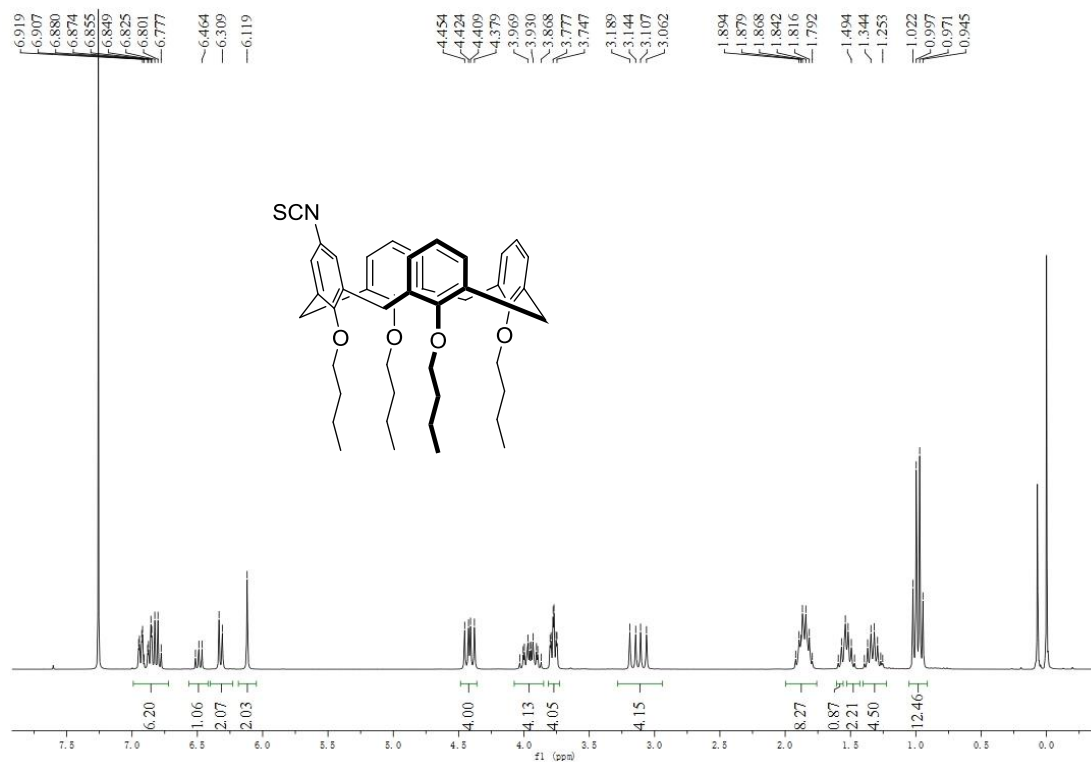

$^{13}\text{C}$  NMR spectrum of **6a**

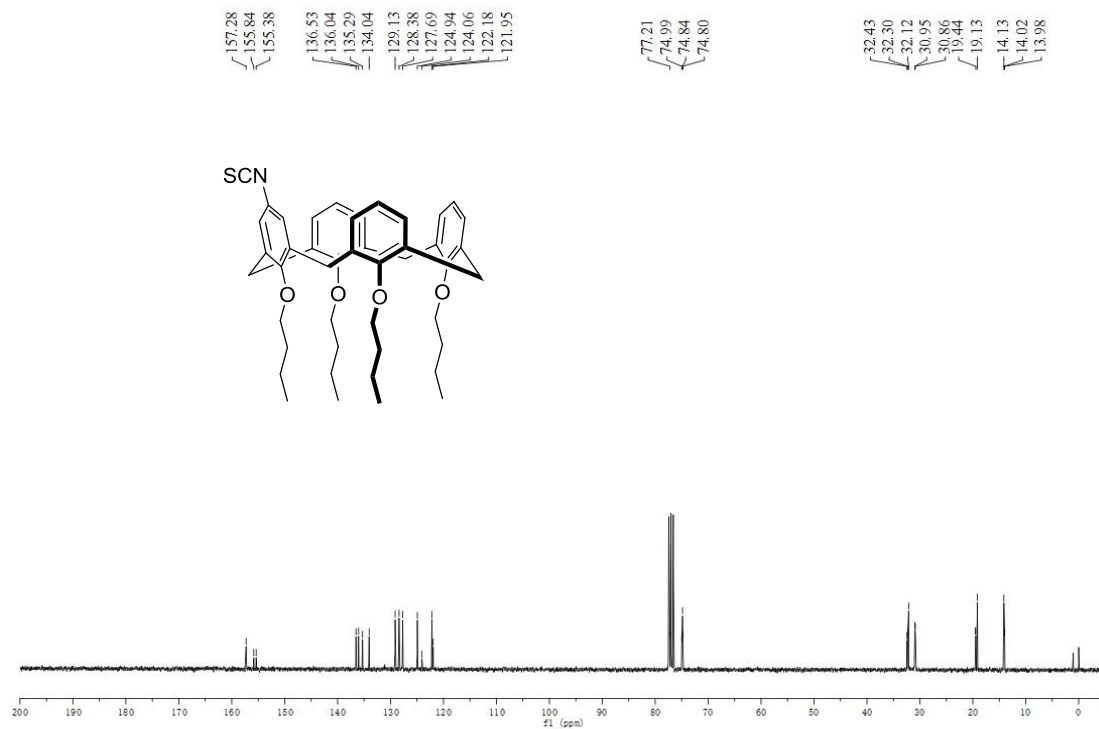

$^1\text{H}$  NMR spectrum of **6b**

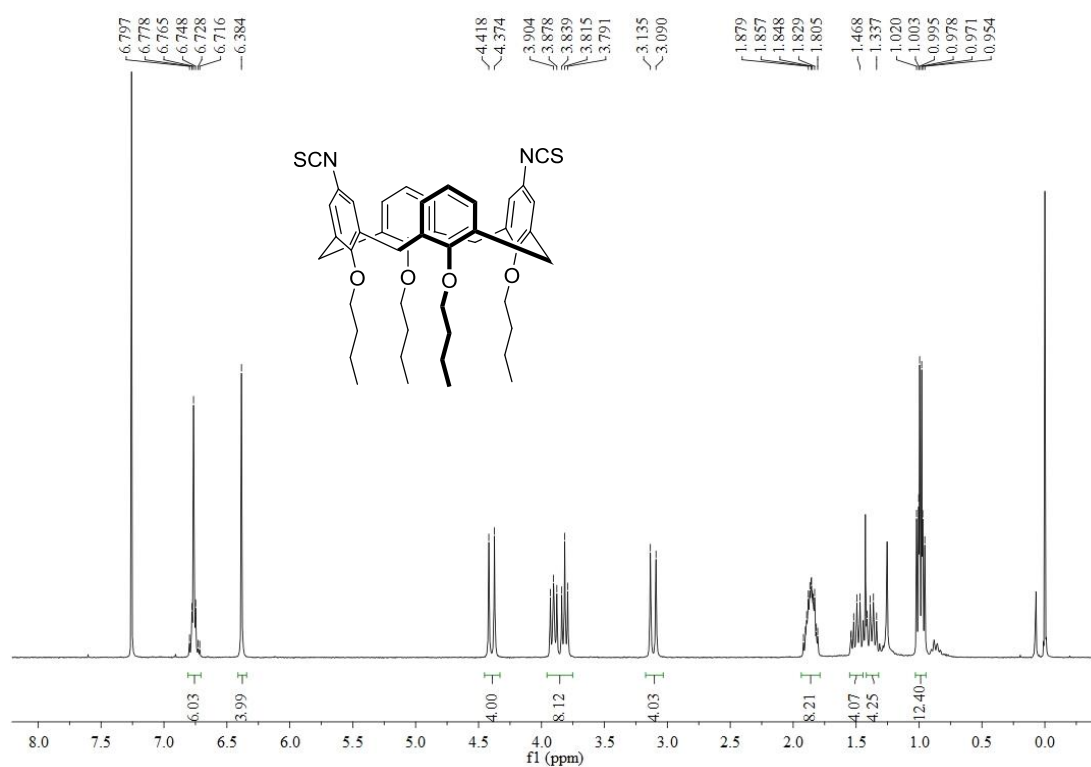

$^{13}\text{C}$  NMR spectrum of **6b**

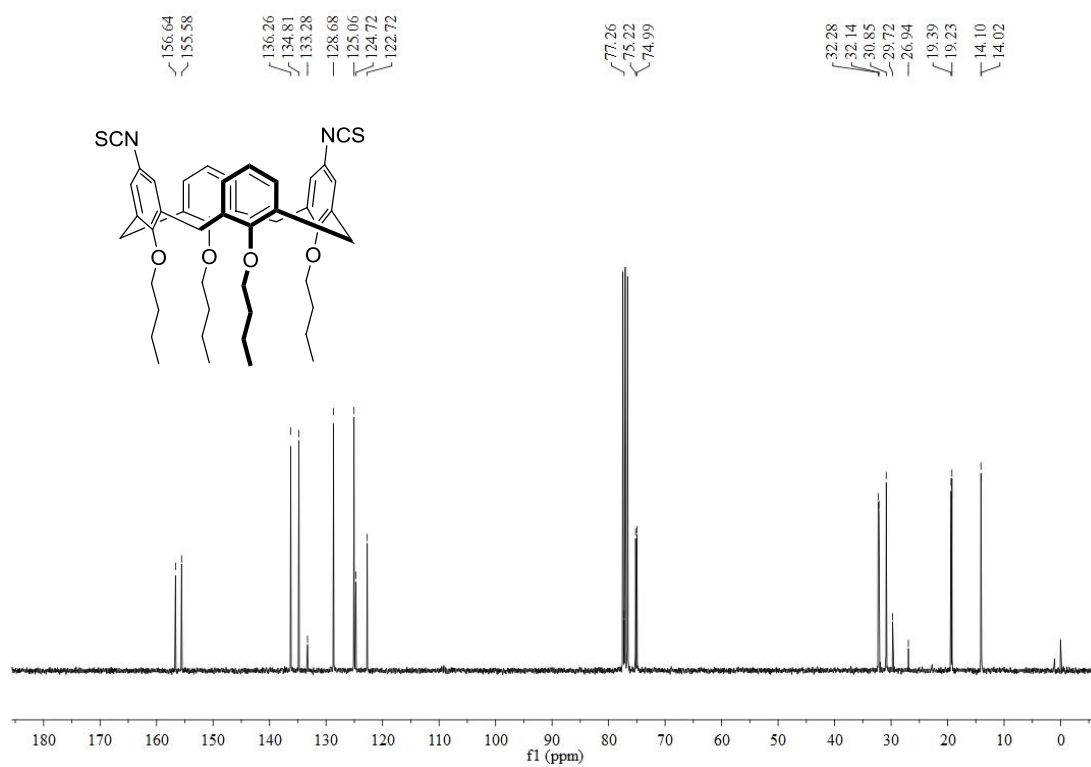

<sup>1</sup>H NMR spectrum of catalyst **1**

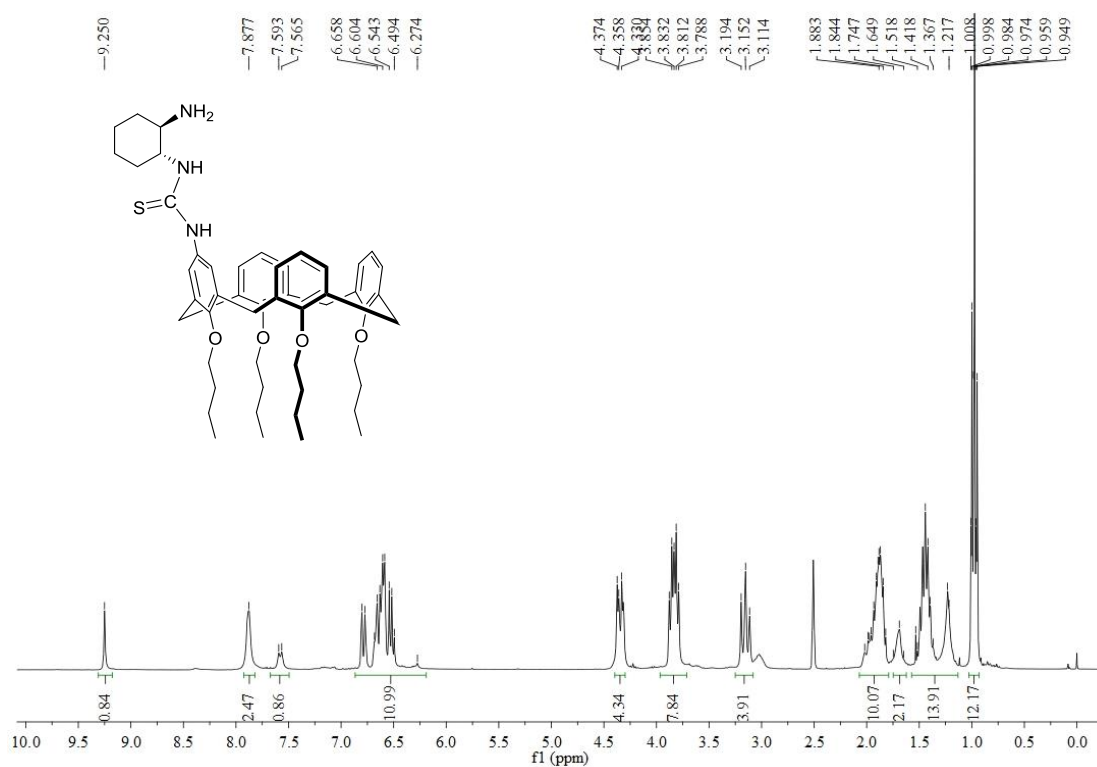

<sup>13</sup>C NMR spectrum of catalyst **1**

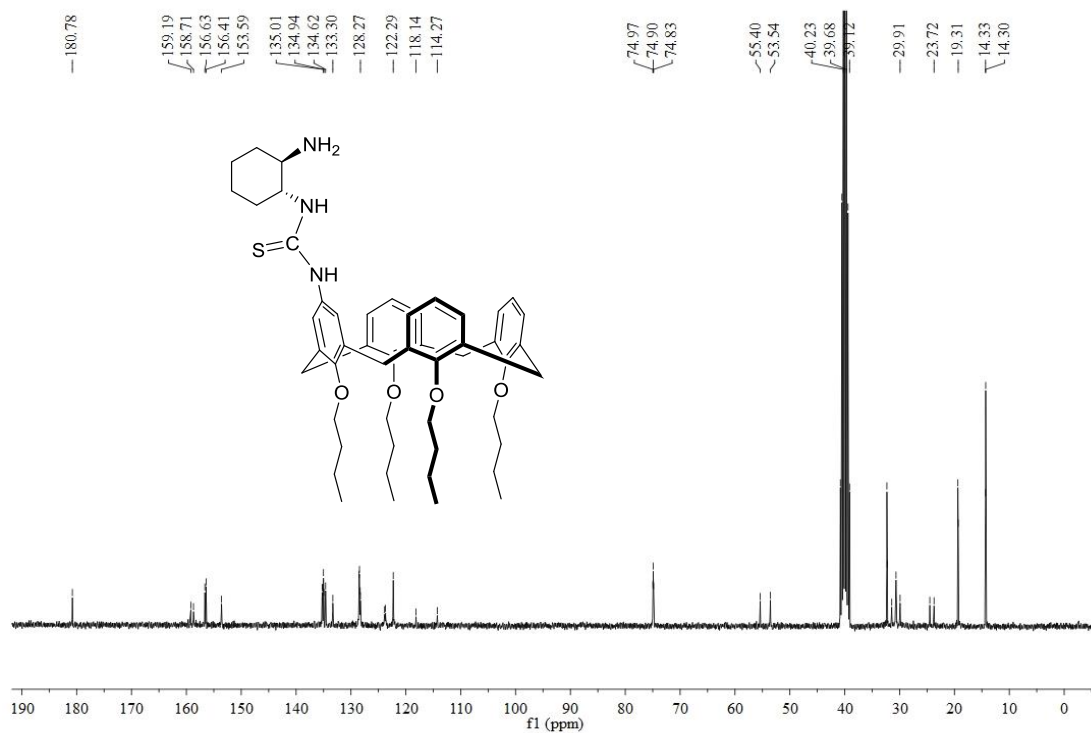

<sup>1</sup>H NMR spectrum of catalyst **2**

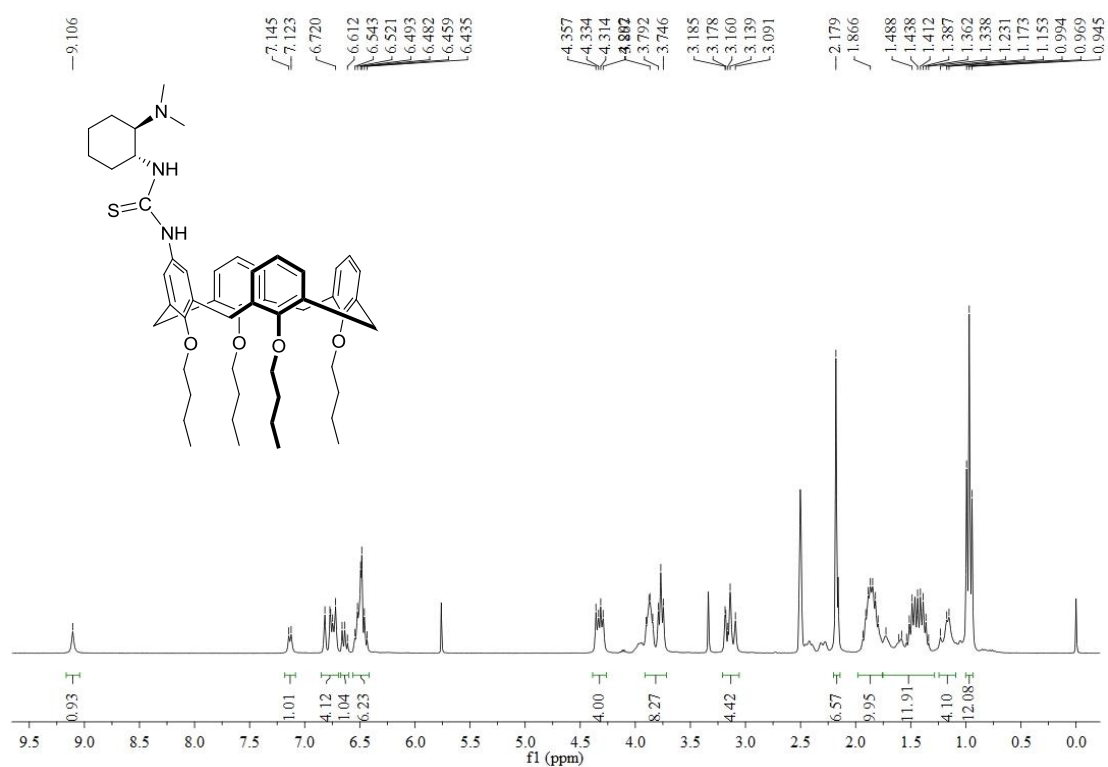

<sup>13</sup>C NMR spectrum of catalyst **2**

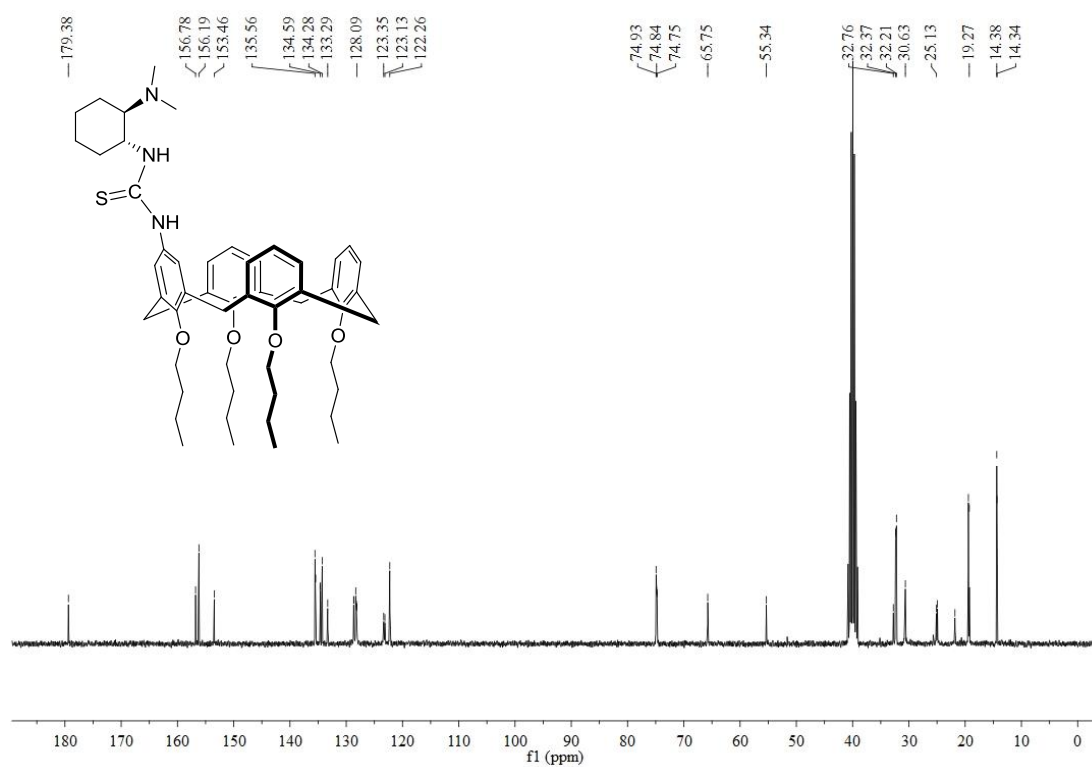

<sup>1</sup>H NMR spectrum of catalyst **3**

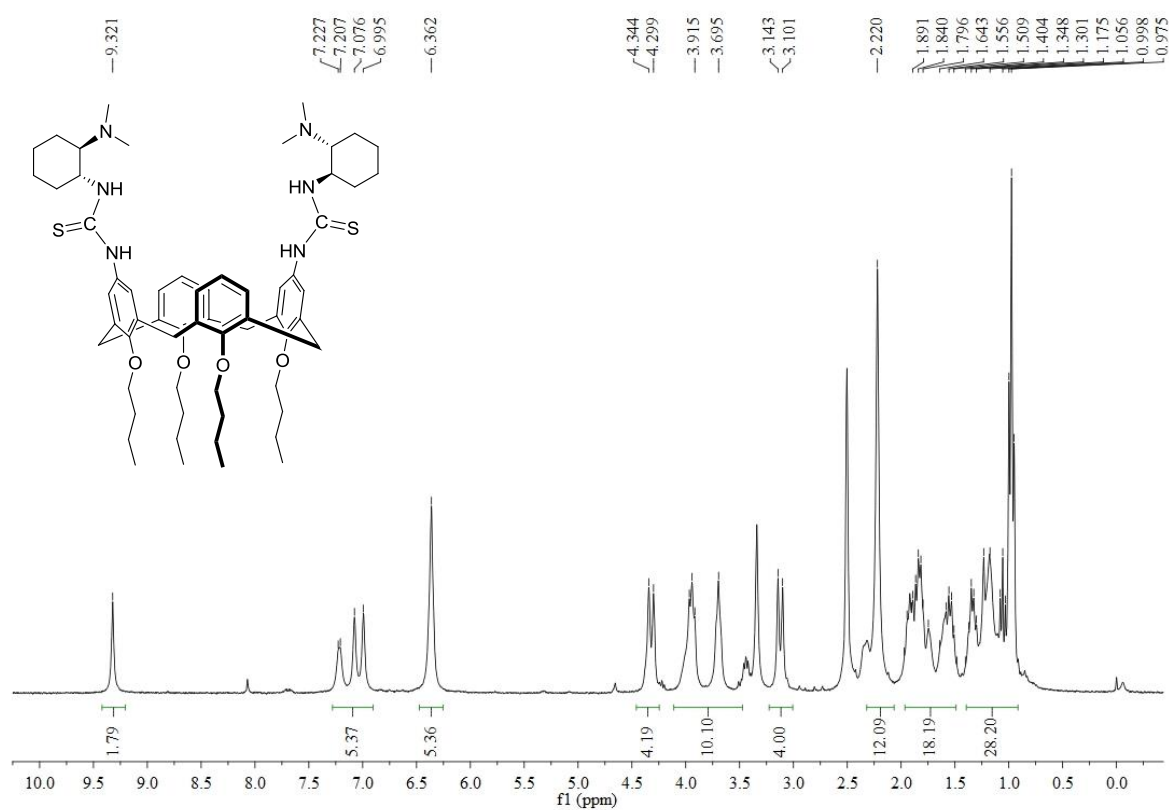

<sup>13</sup>C NMR spectrum of catalyst **3**

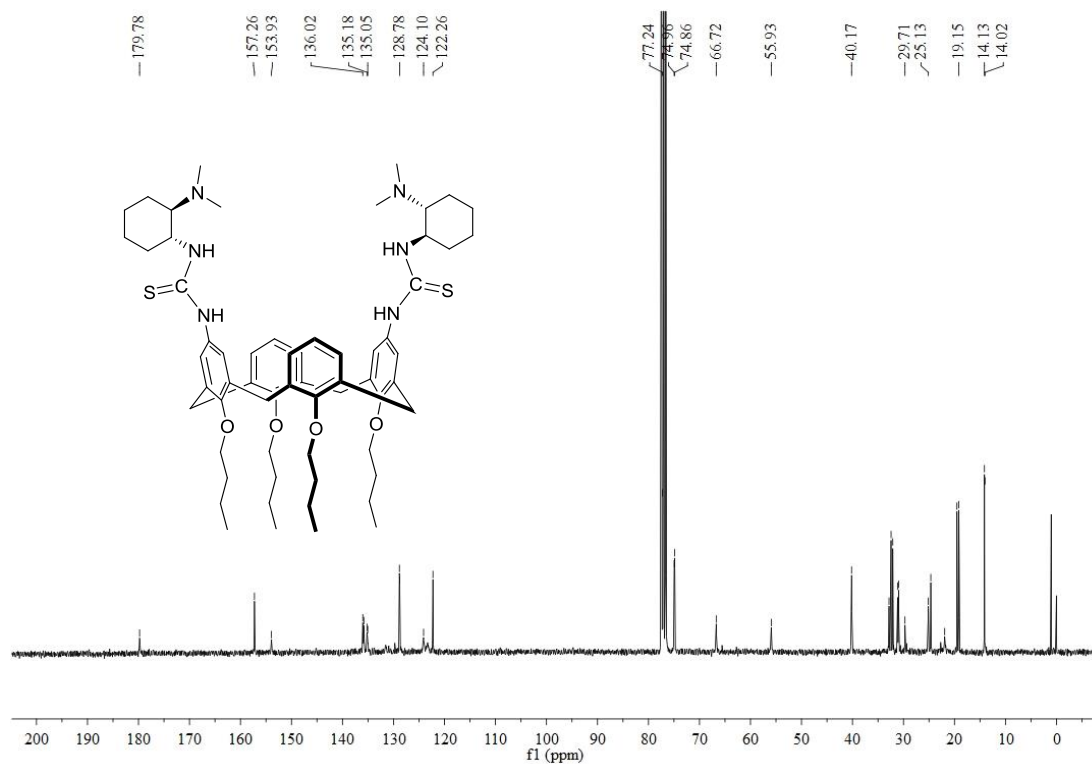

<sup>1</sup>H NMR spectrum of catalyst **4**

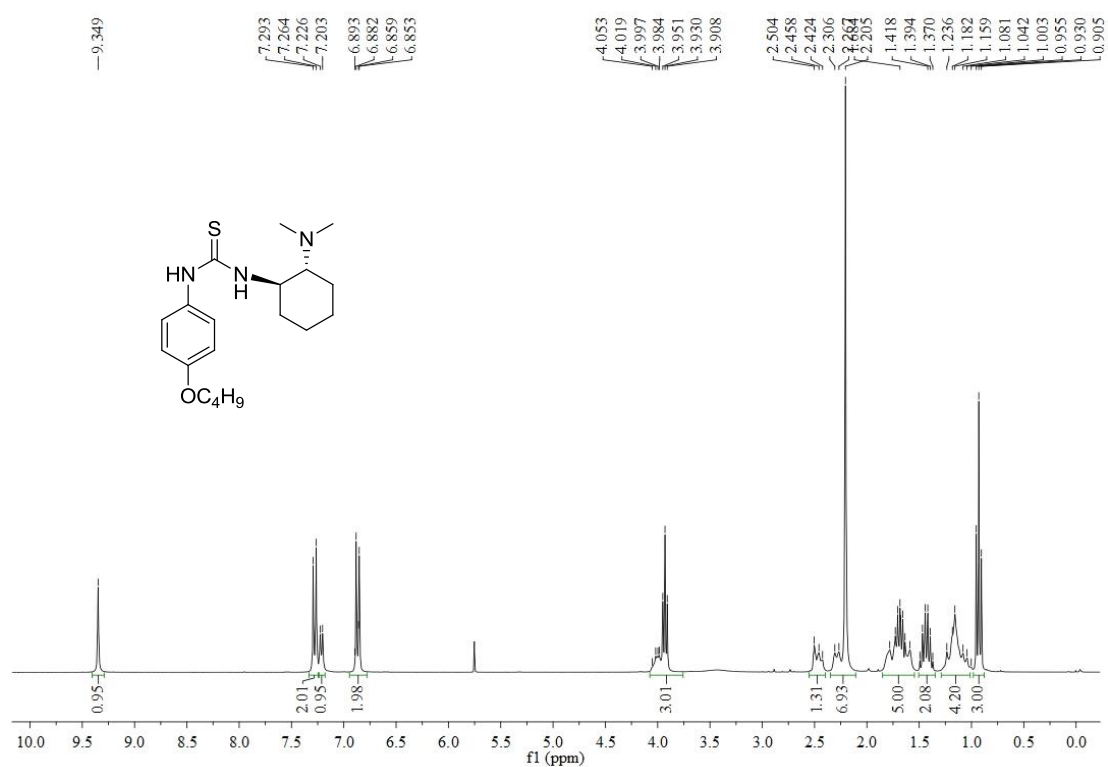

<sup>13</sup>C NMR spectrum of catalyst **4**

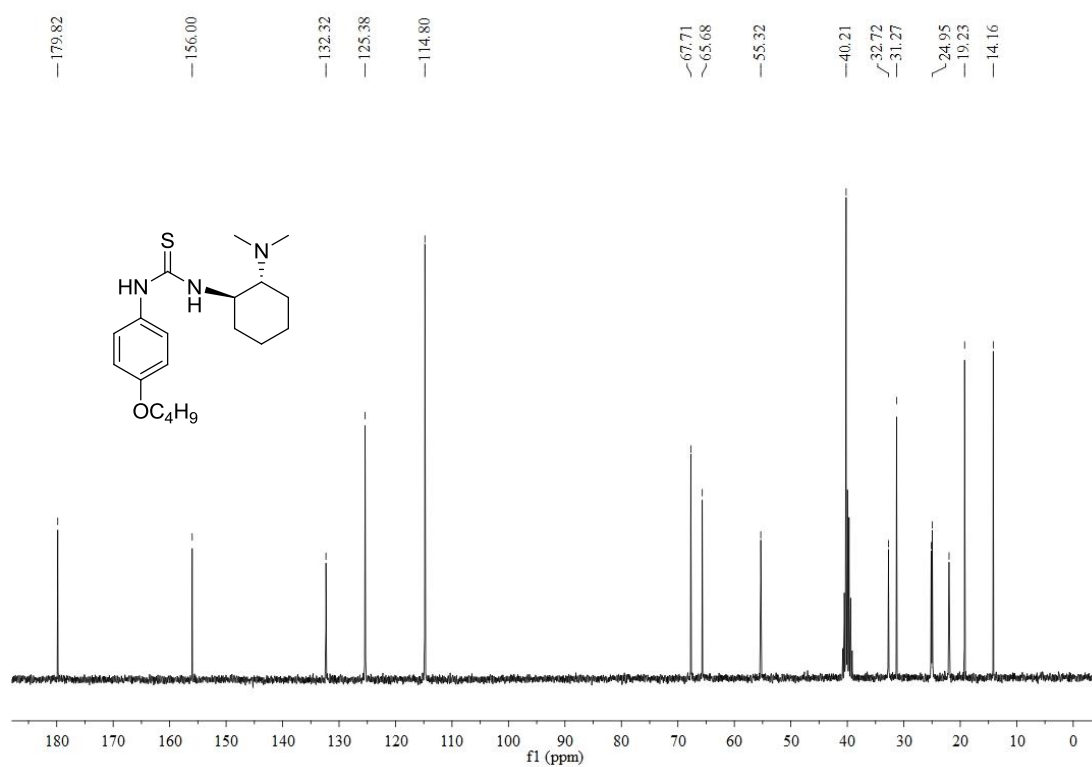



## 5. NMR spectra for products

$^1\text{H}$  NMR spectrum of **9a**

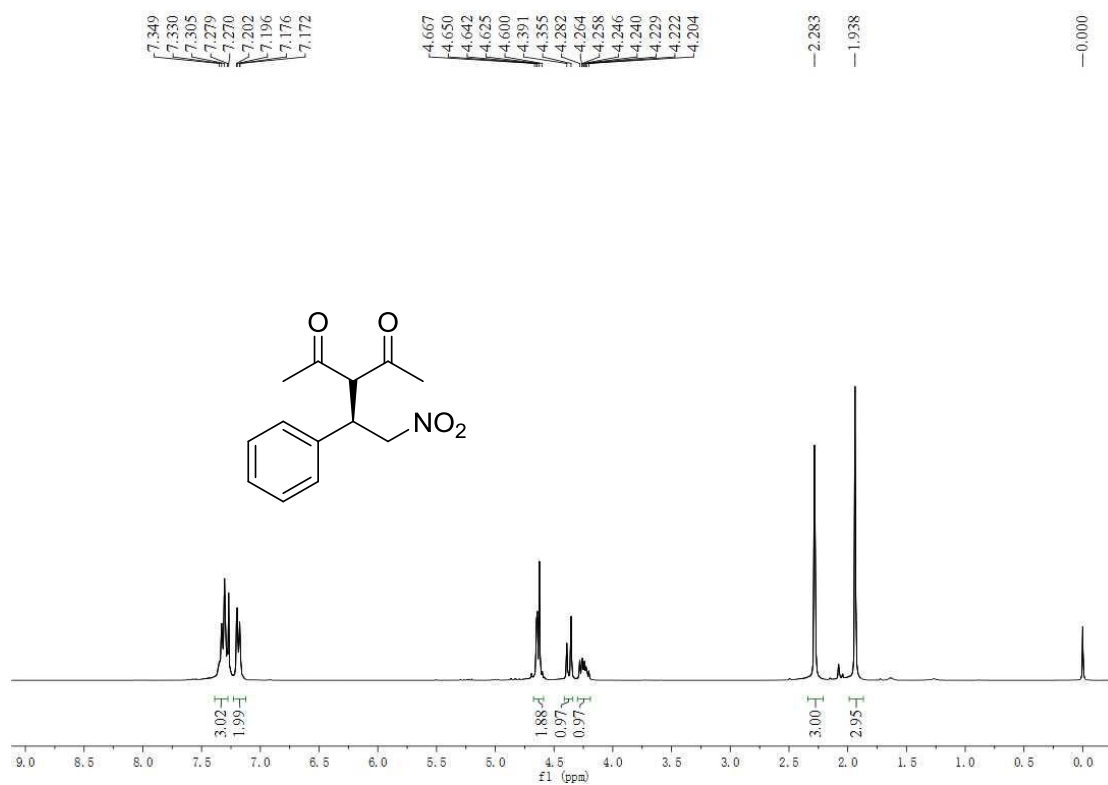

$^{13}\text{C}$  NMR spectrum of **9a**

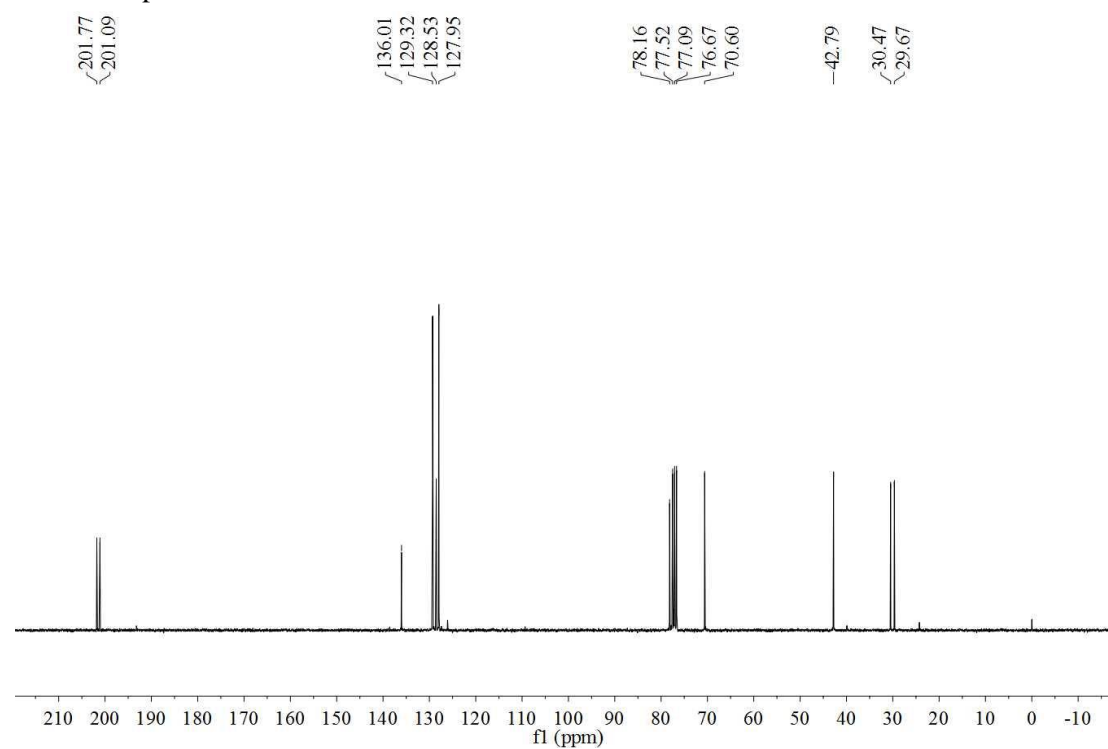

<sup>1</sup>H NMR spectrum of **9b**

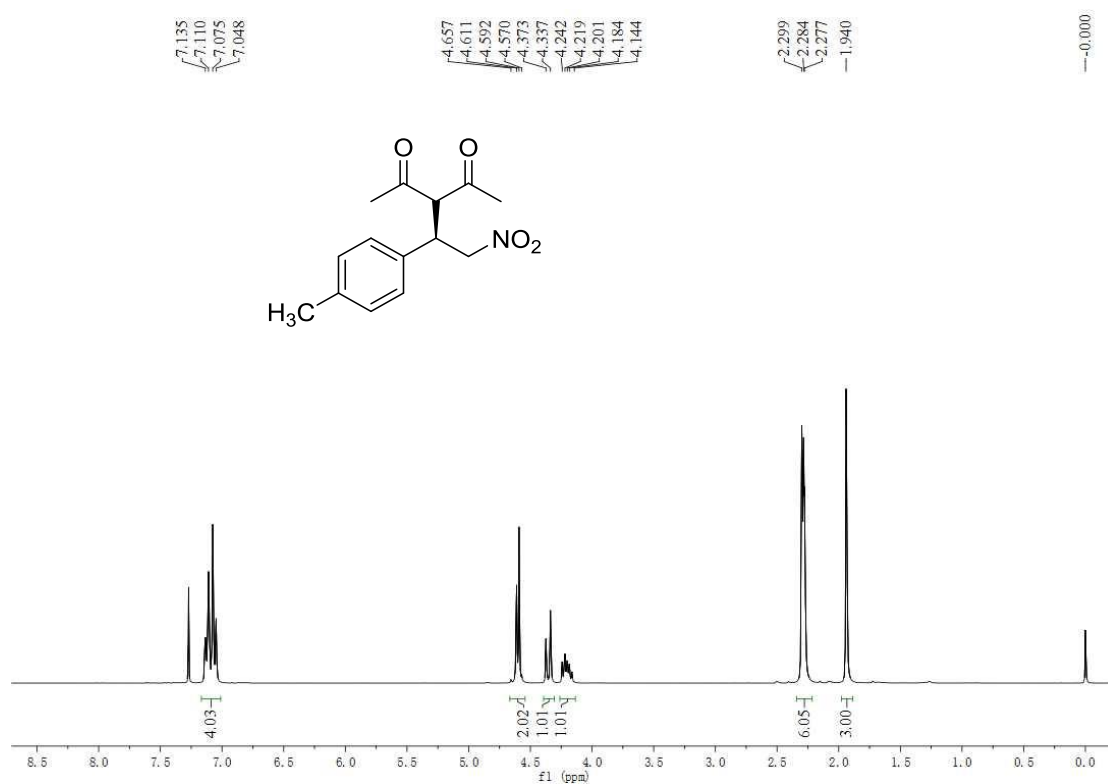

<sup>13</sup>C NMR spectrum of **9b**

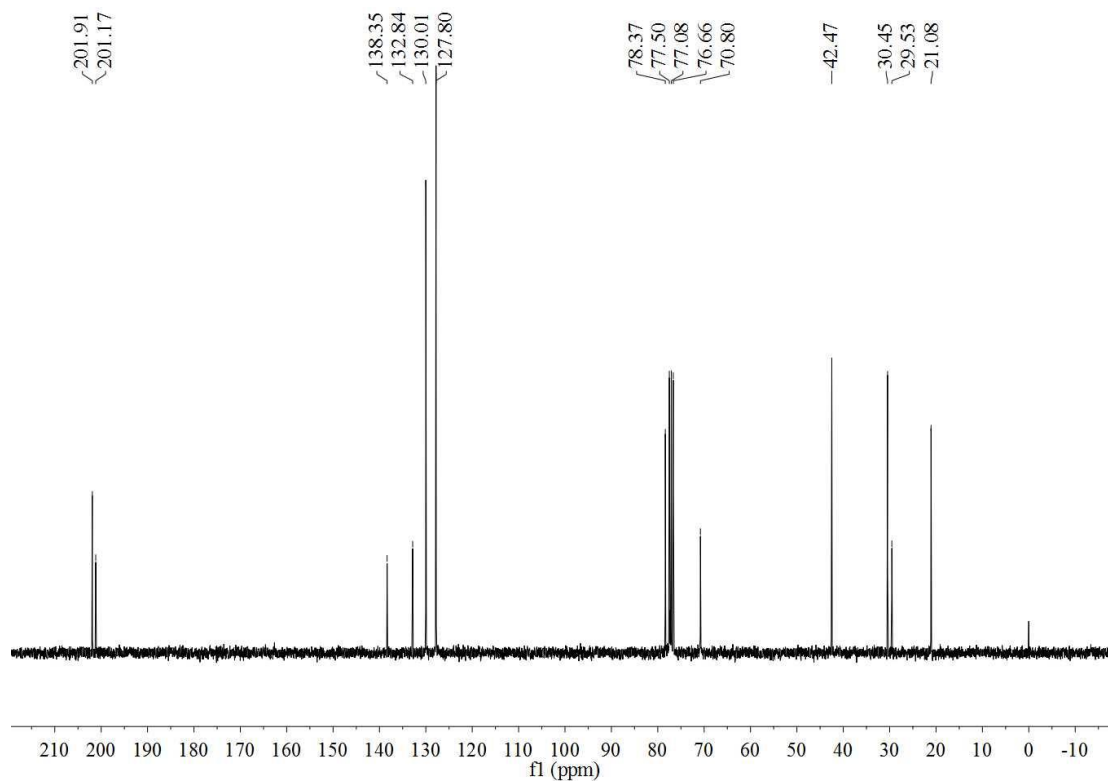

<sup>1</sup>H NMR spectrum of **9c**

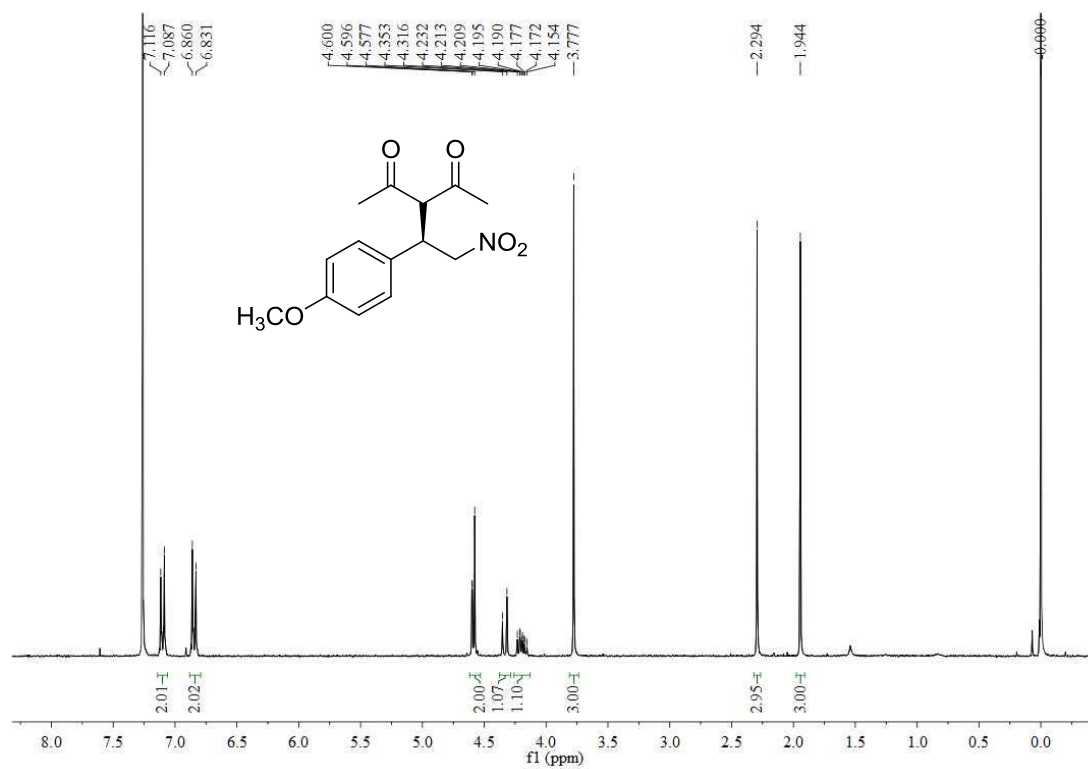

<sup>13</sup>C NMR spectrum of **9c**

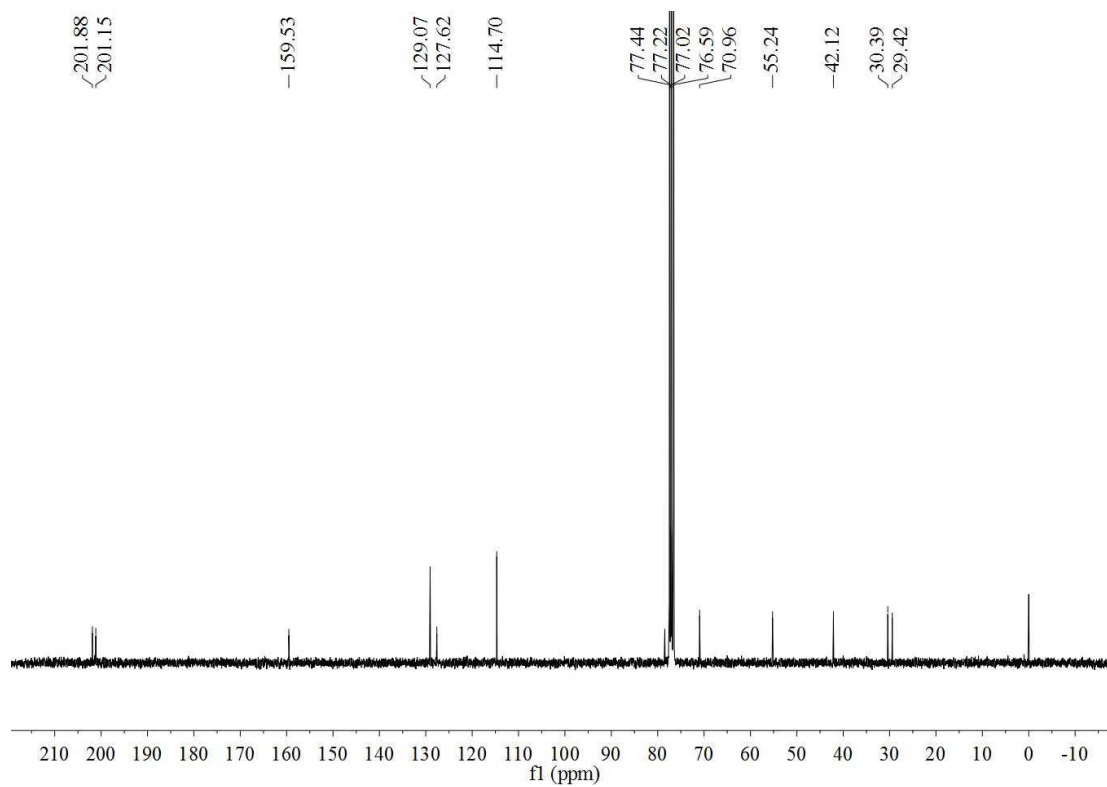

<sup>1</sup>H NMR spectrum of **9d**

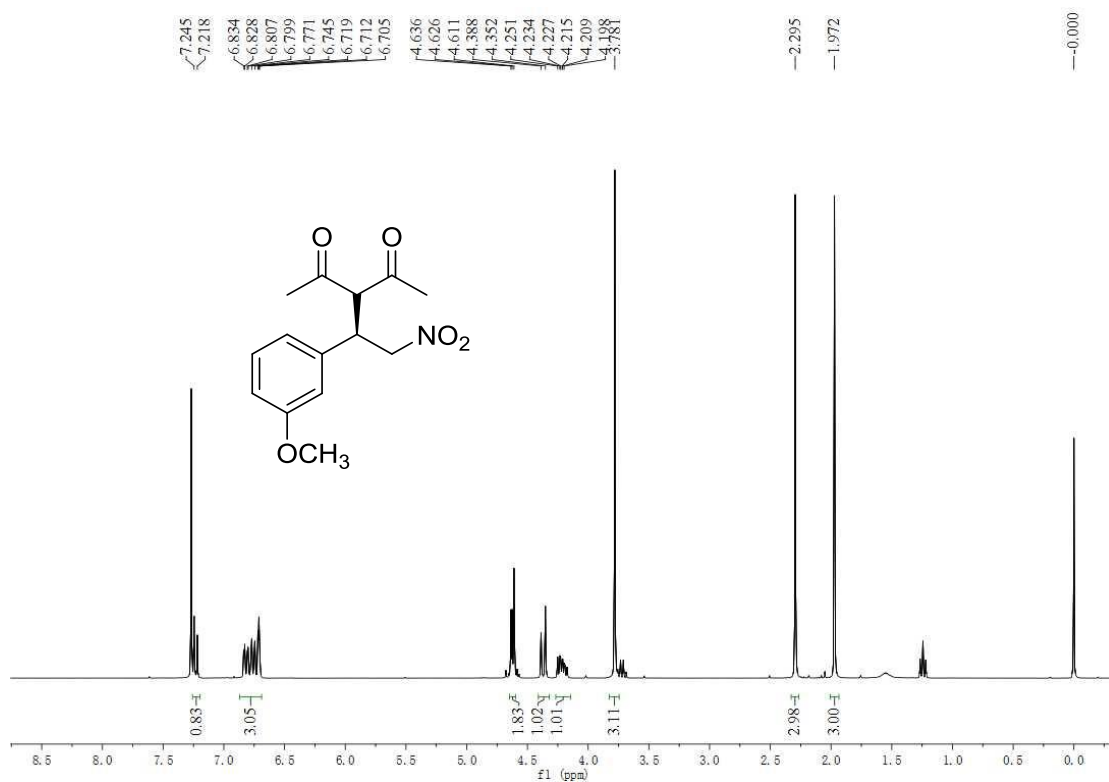

<sup>13</sup>C NMR spectrum of **9d**

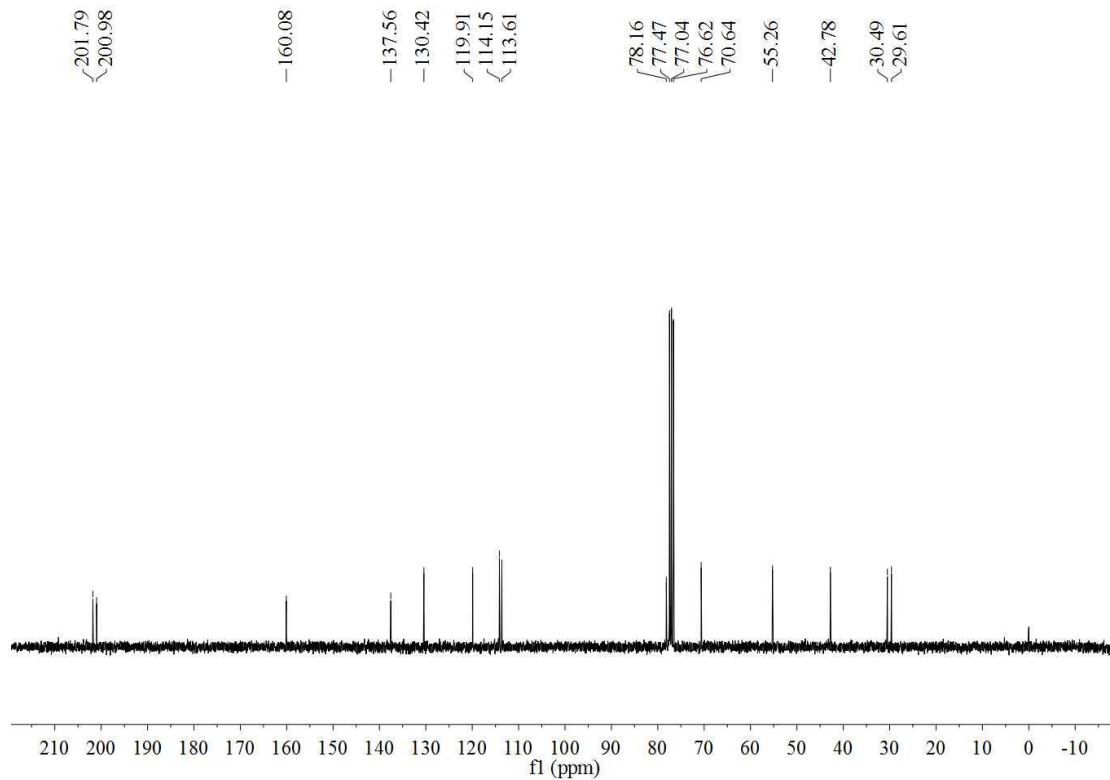

<sup>1</sup>H NMR spectrum of **9e**

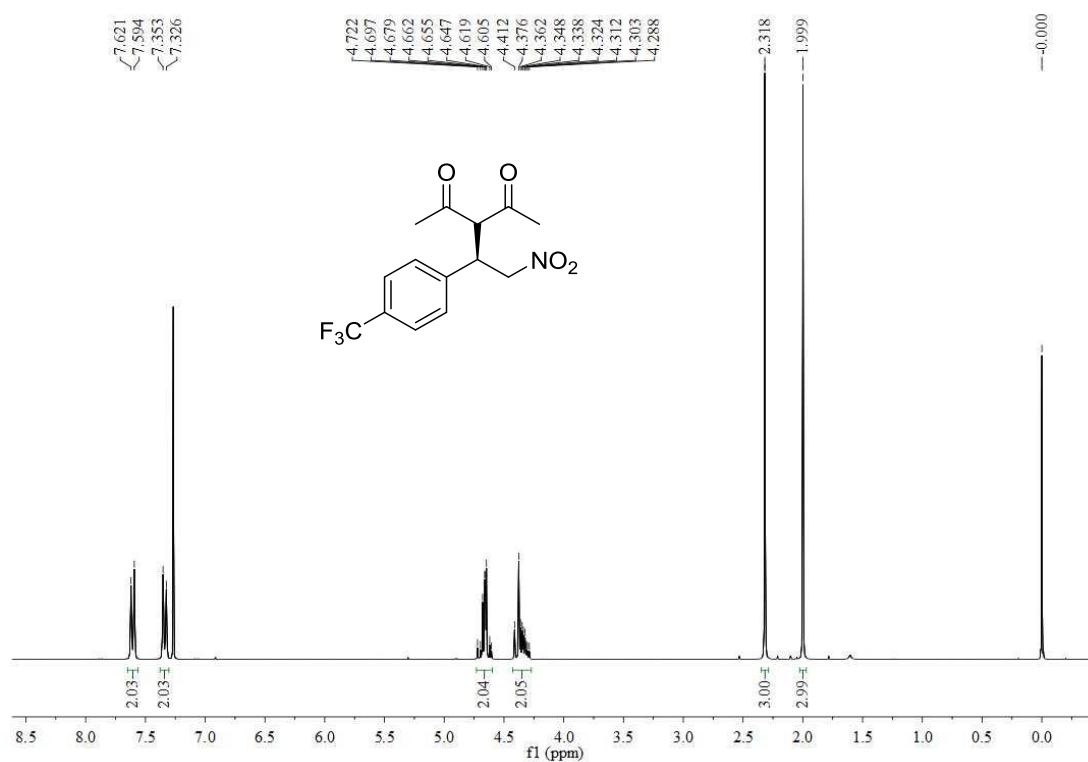

<sup>13</sup>C NMR spectrum of **9e**

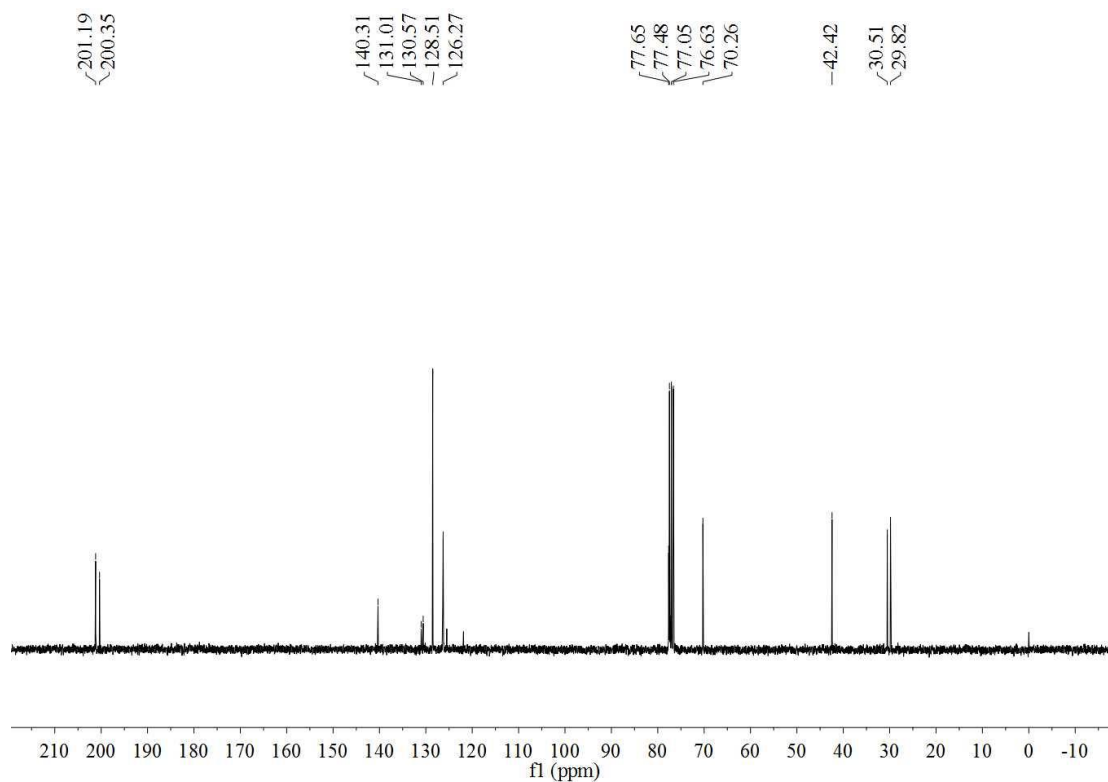

<sup>1</sup>H NMR spectrum of **9f**

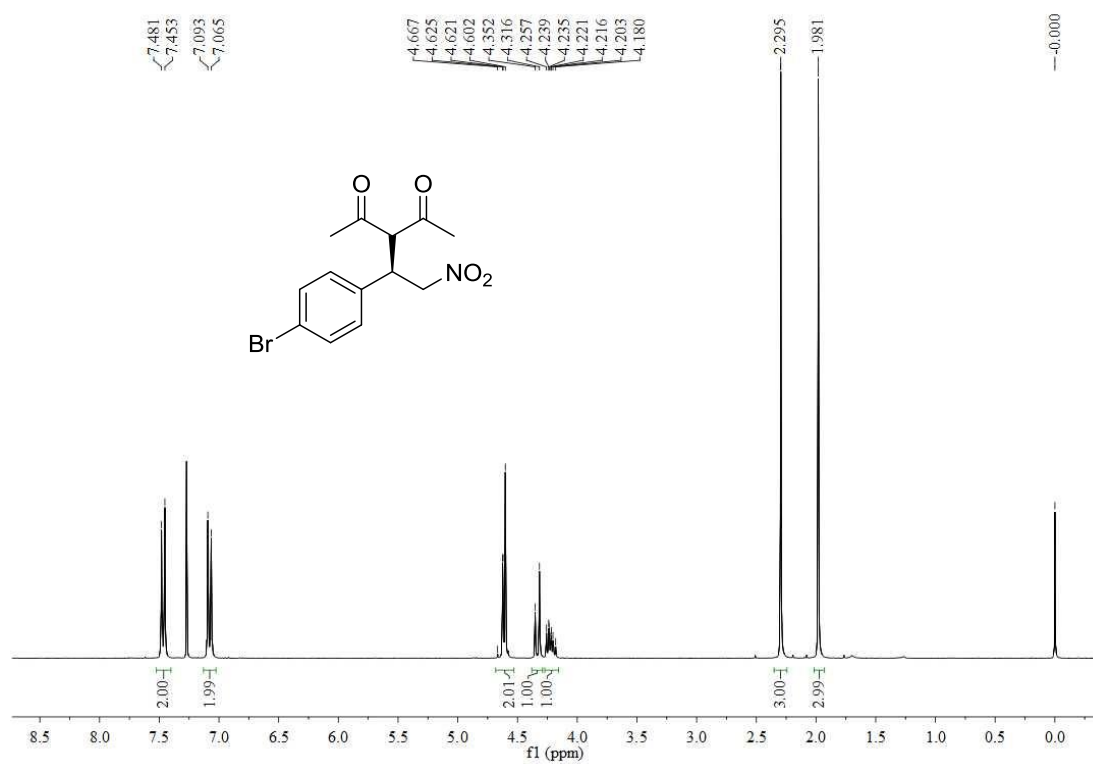

<sup>13</sup>C NMR spectrum of **9f**

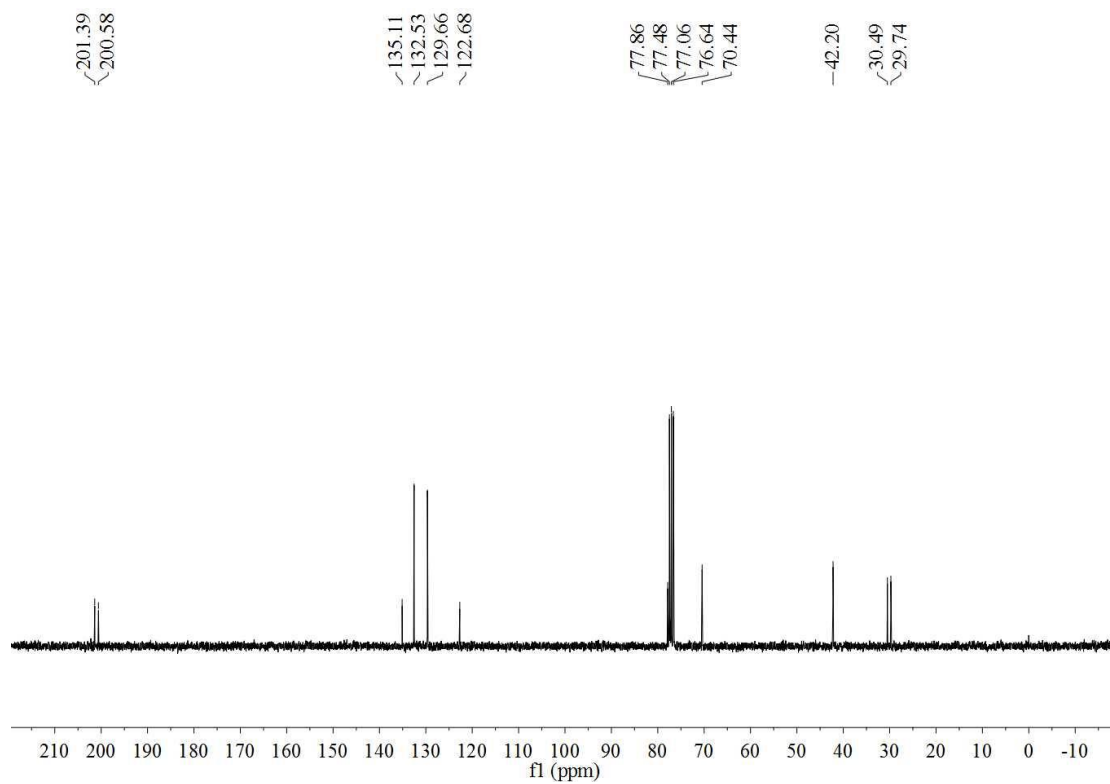

<sup>1</sup>H NMR spectrum of **9g**

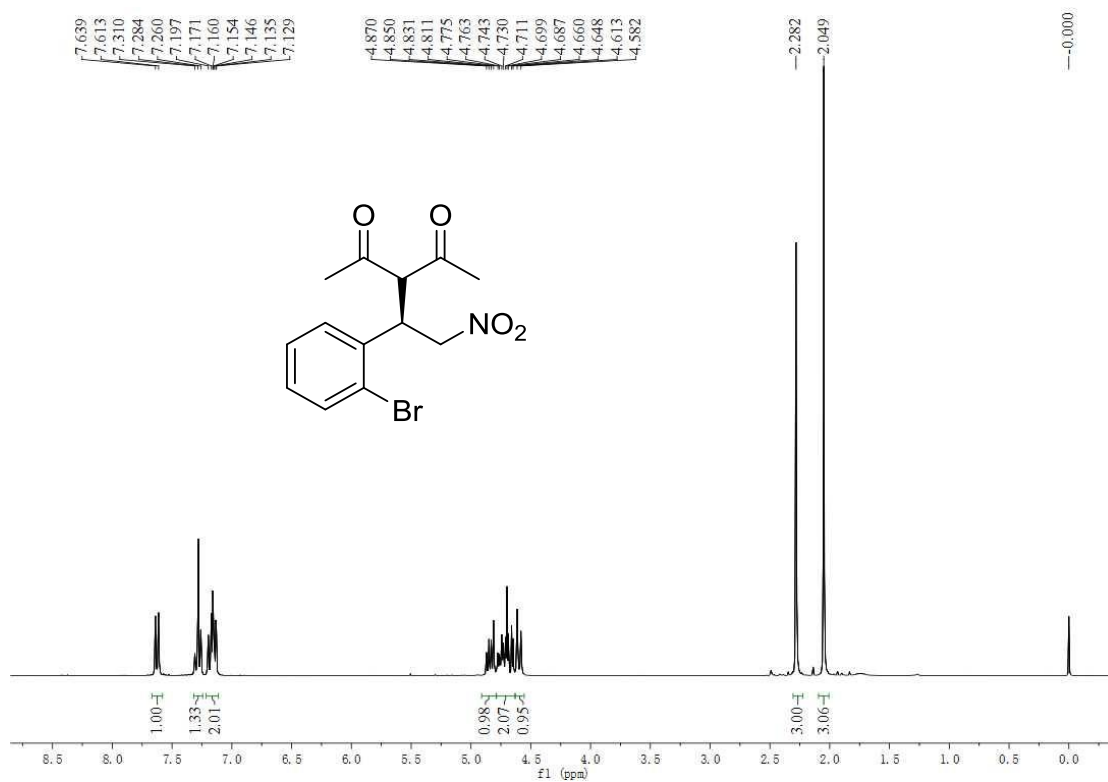

<sup>13</sup>C NMR spectrum of **9g**

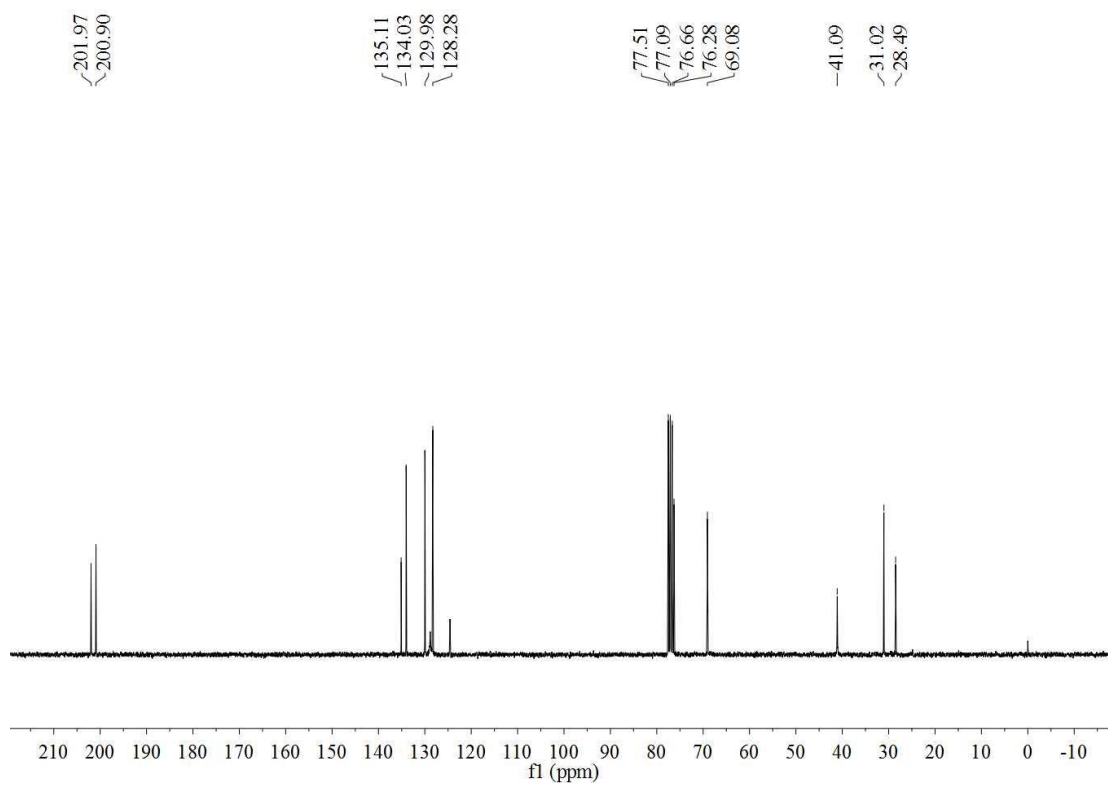

<sup>1</sup>H NMR spectrum of **9h**

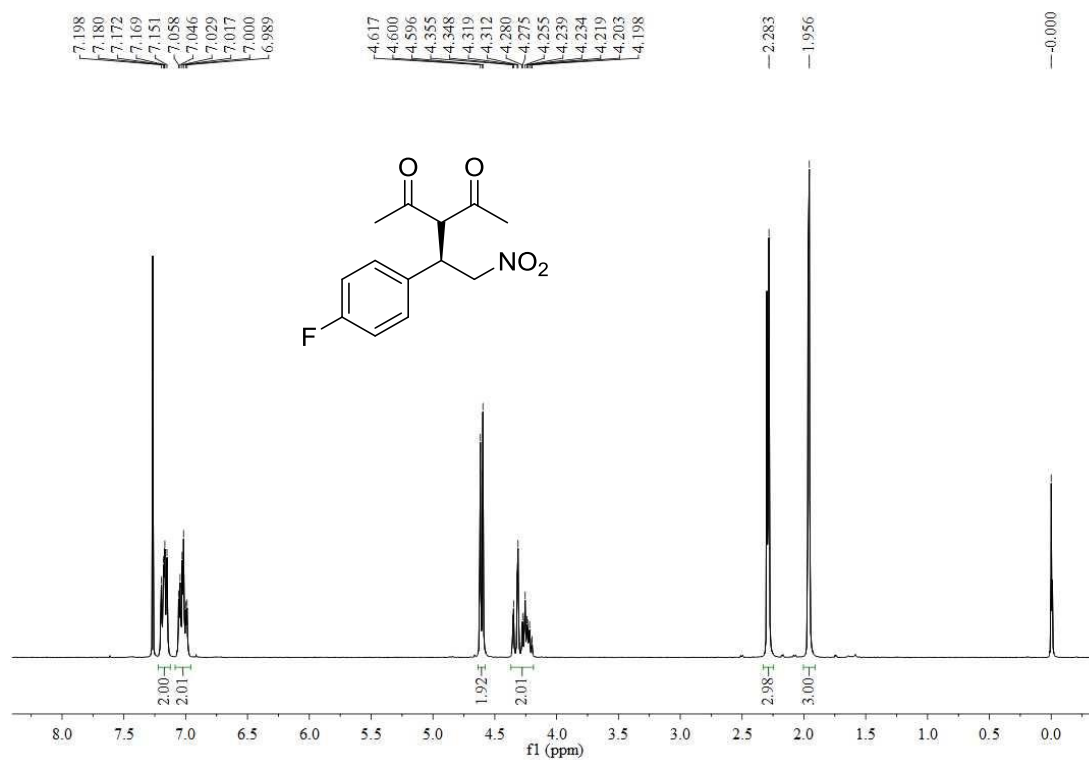

<sup>13</sup>C NMR spectrum of **9h**

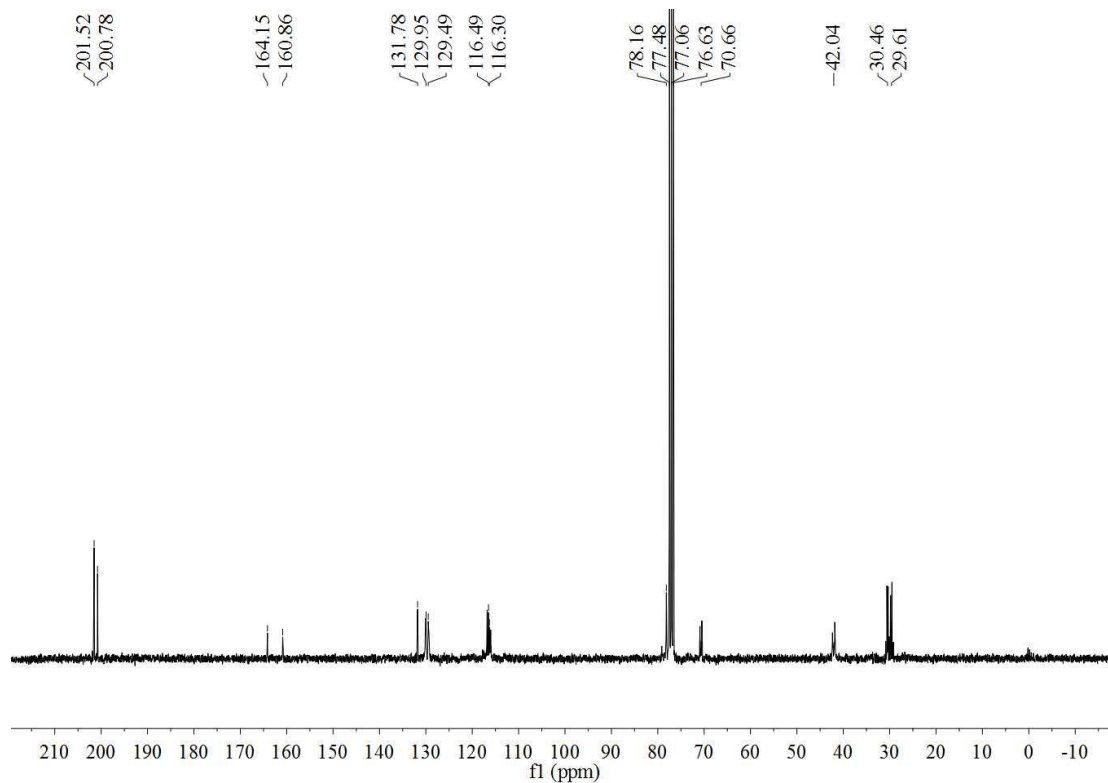



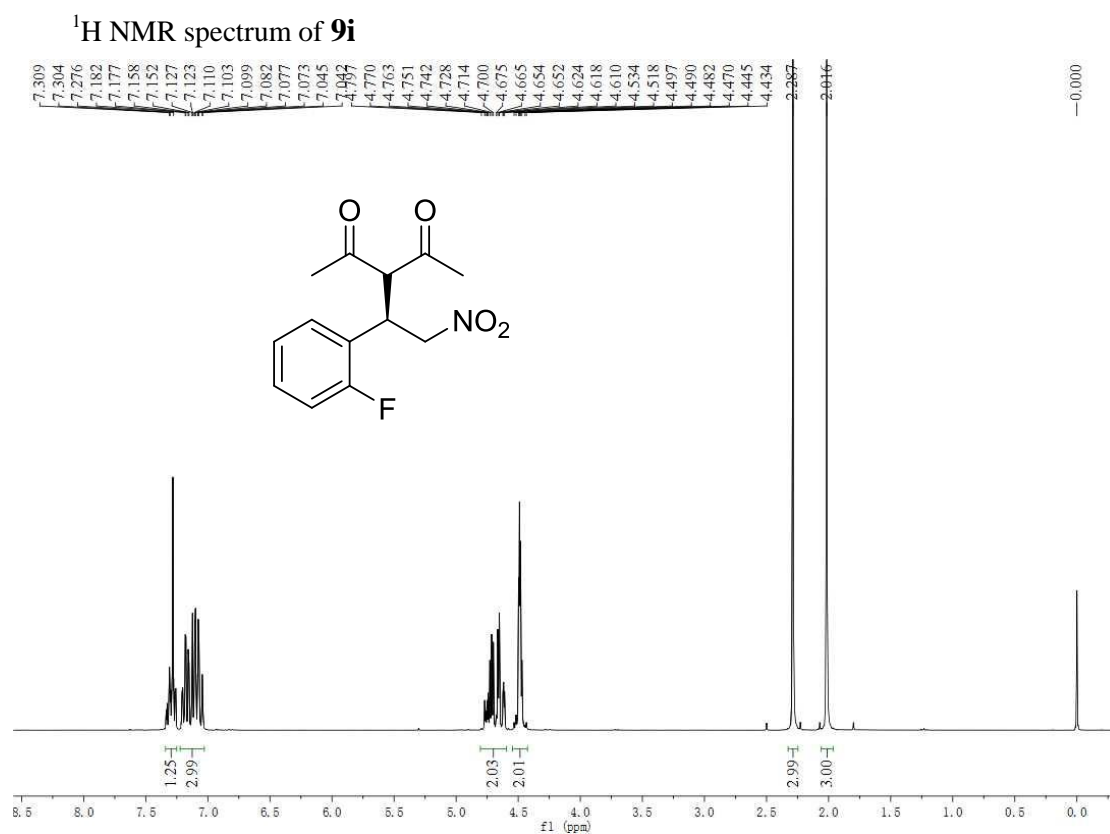

<sup>13</sup>C NMR spectrum of **9i**

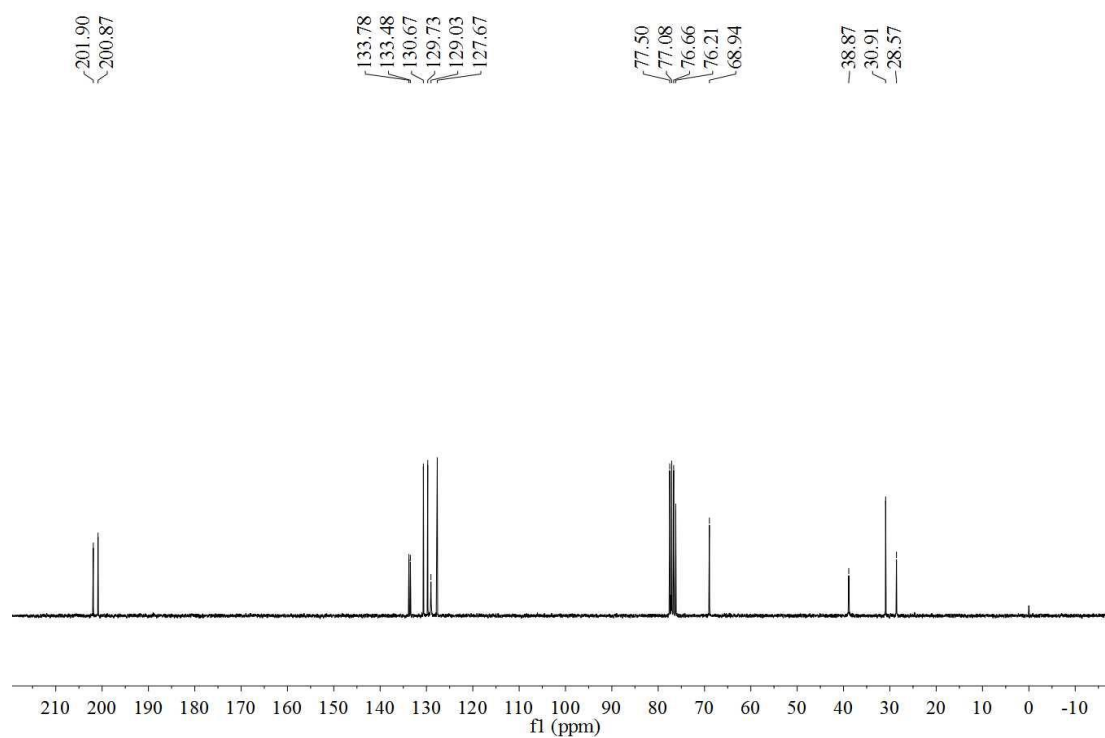

<sup>1</sup>H NMR spectrum of **9j**

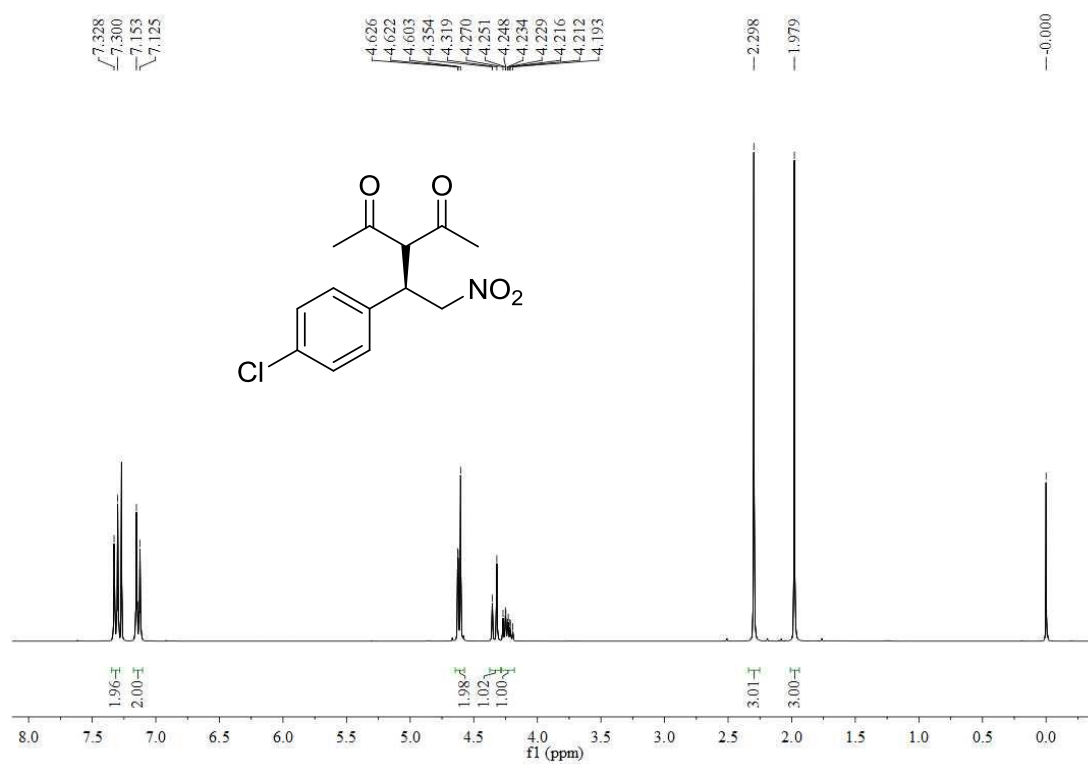

<sup>13</sup>C NMR spectrum of **9j**

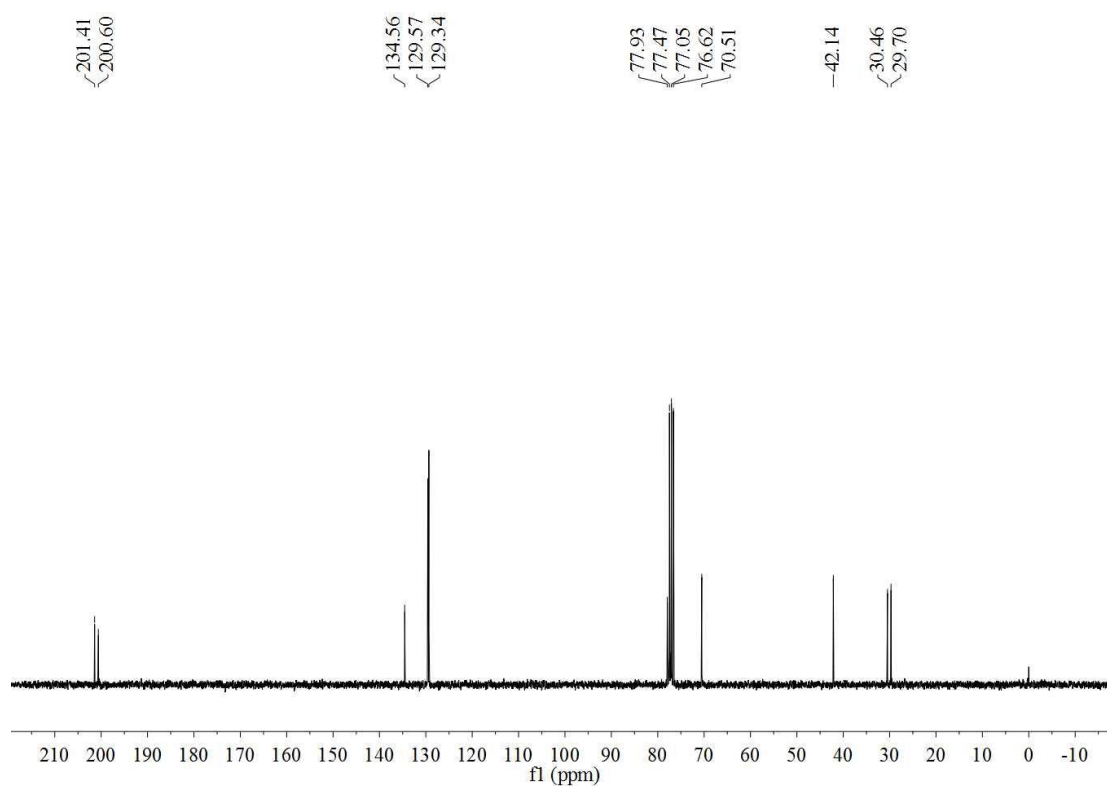

<sup>1</sup>H NMR spectrum of **9k**

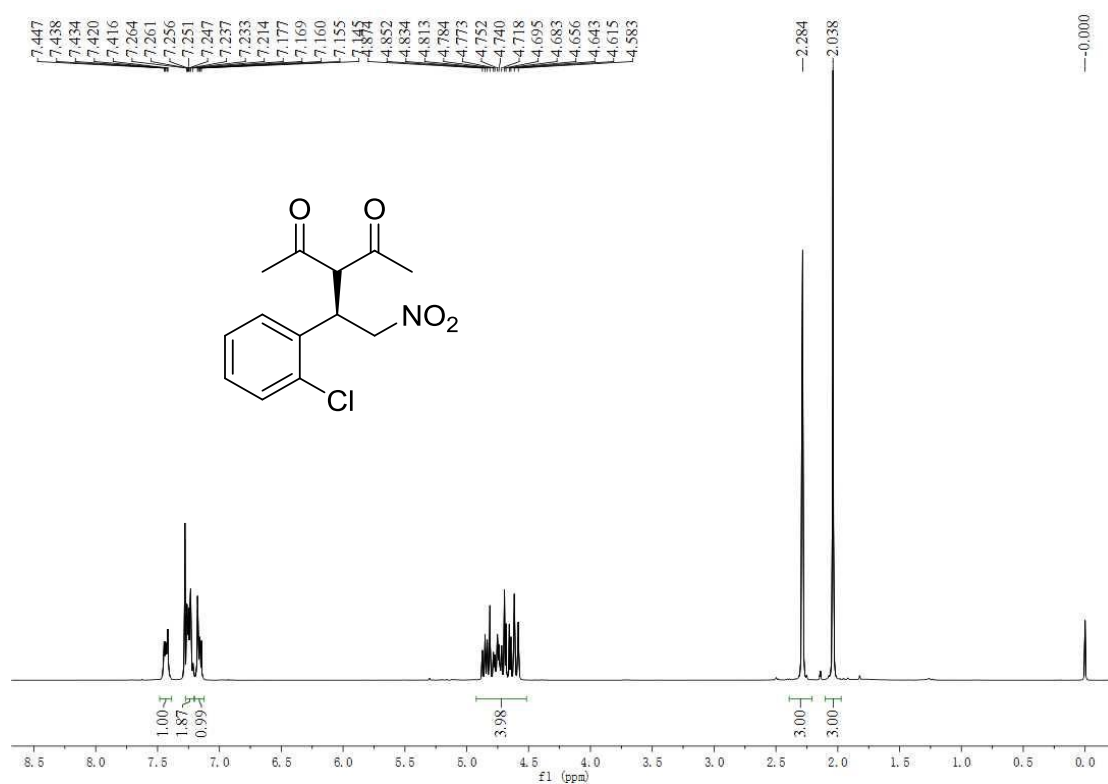

<sup>13</sup>C NMR spectrum of **9k**

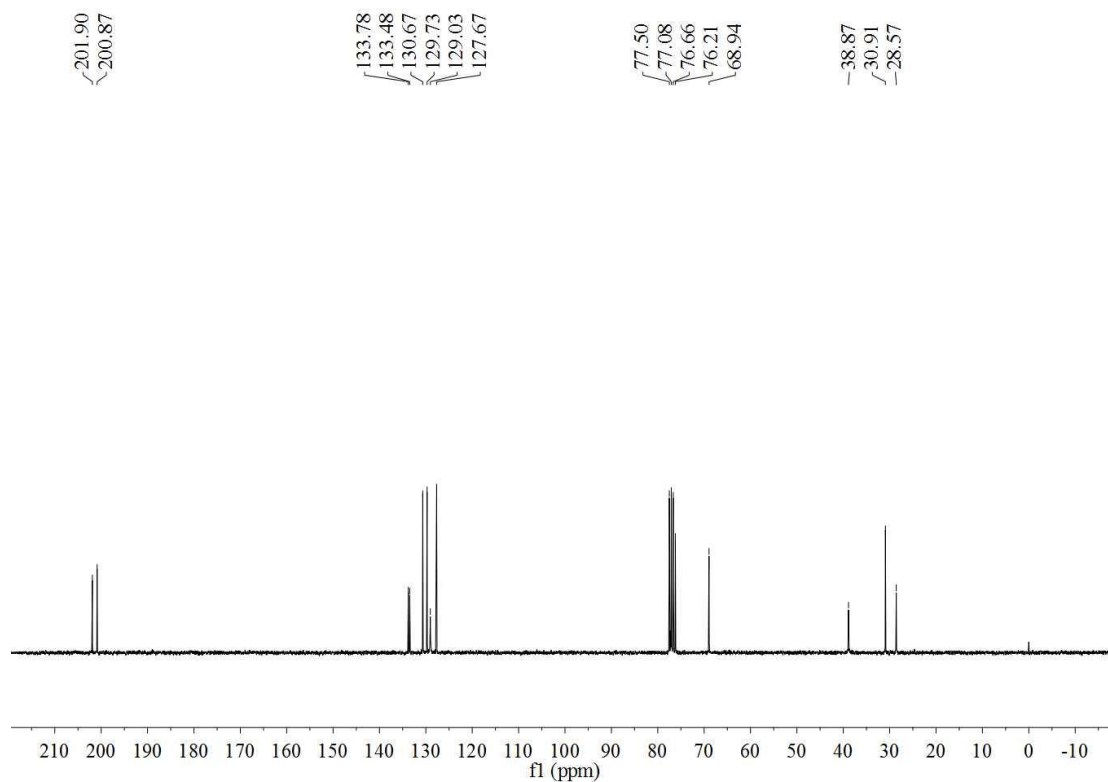

6. HPLC chromatograms

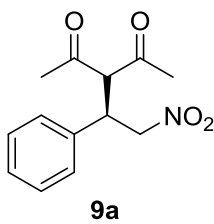

(Racemic)

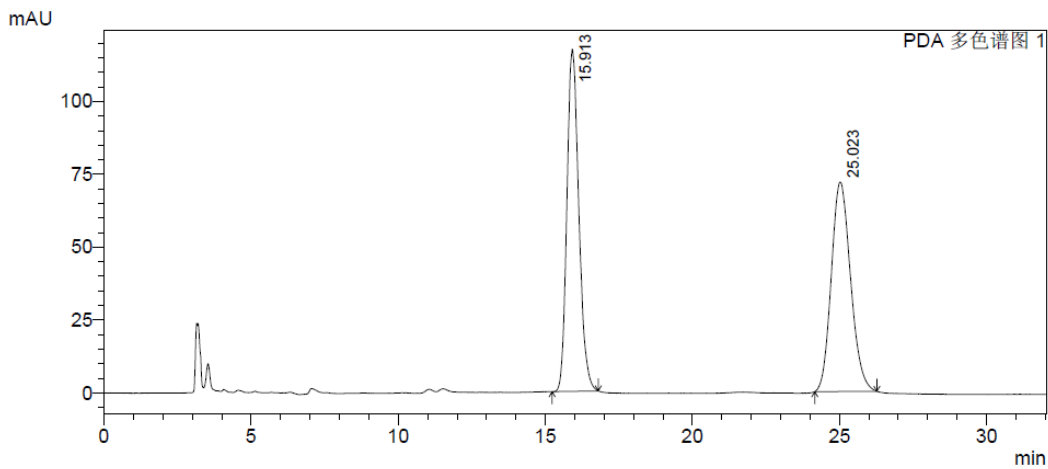

(Chiral)

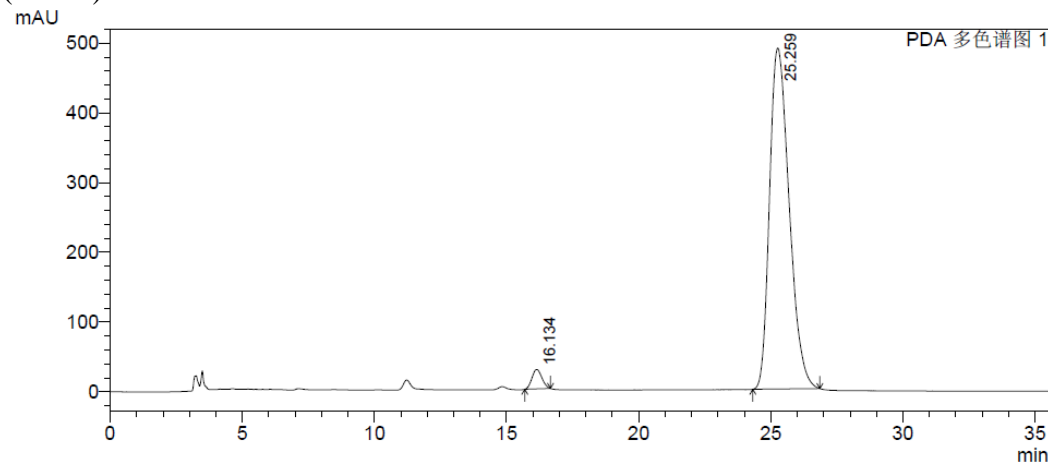

1 PDA 多色谱图 1/210nm 4nm

峰表

| PDA Ch1 210nm 4nm |        |          |        |         |         |
|-------------------|--------|----------|--------|---------|---------|
| 峰#                | 保留时间   | 面积       | 高度     | 面积 %    | 高度 %    |
| 1                 | 16.134 | 728965   | 27922  | 2.803   | 5.401   |
| 2                 | 25.259 | 25282071 | 489071 | 97.197  | 94.599  |
| 总计                |        | 26011036 | 516993 | 100.000 | 100.000 |

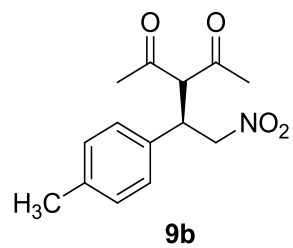

(Racemic)

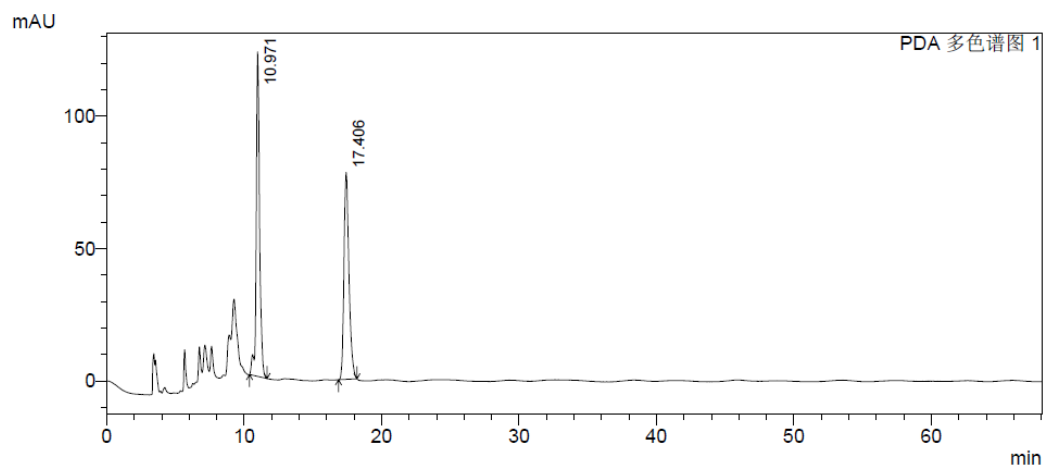

(Chiral)

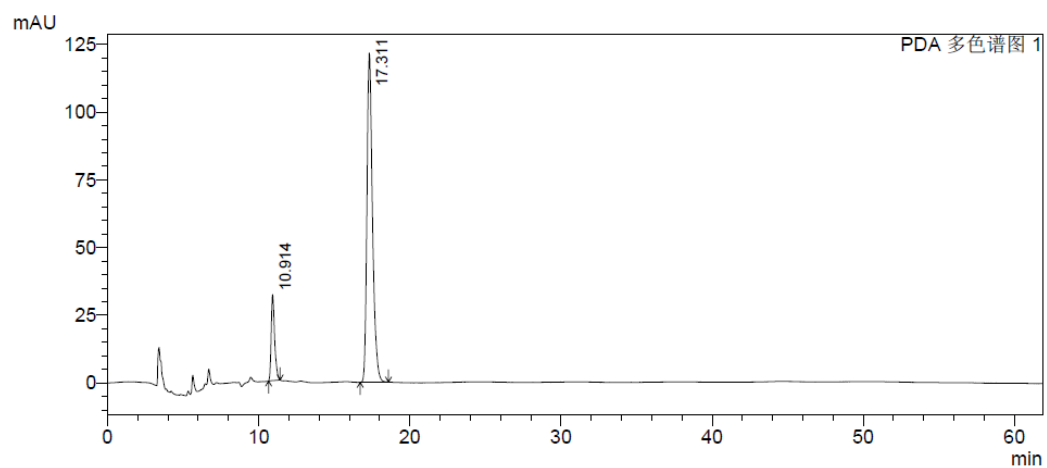

1 PDA 多色谱图 1/210nm 4nm

峰表

| 峰# | 保留时间   | 面积      | 高度     | 面积 %    | 高度 %    |
|----|--------|---------|--------|---------|---------|
| 1  | 10.914 | 500672  | 31766  | 13.878  | 20.716  |
| 2  | 17.311 | 3107098 | 121578 | 86.122  | 79.284  |
| 总计 |        | 3607770 | 153344 | 100.000 | 100.000 |

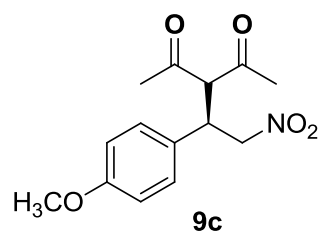

(Racemic)

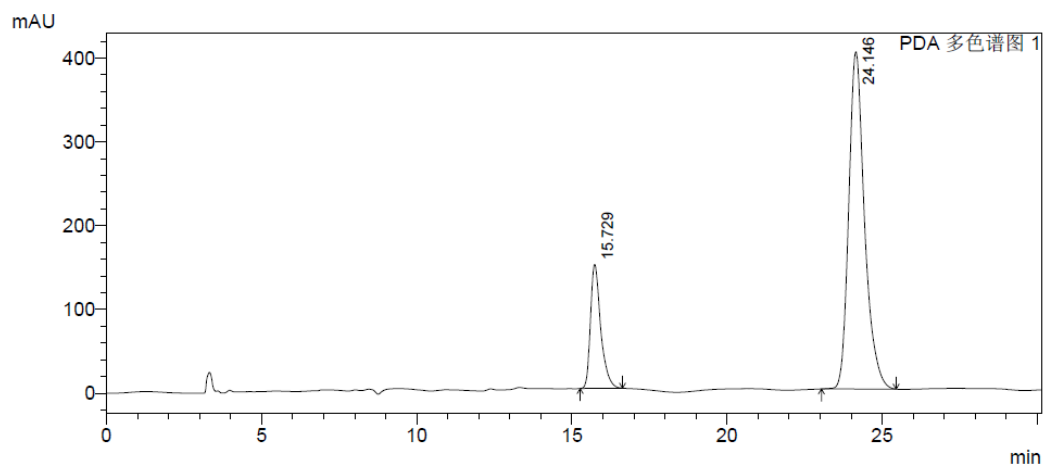

(Chiral)

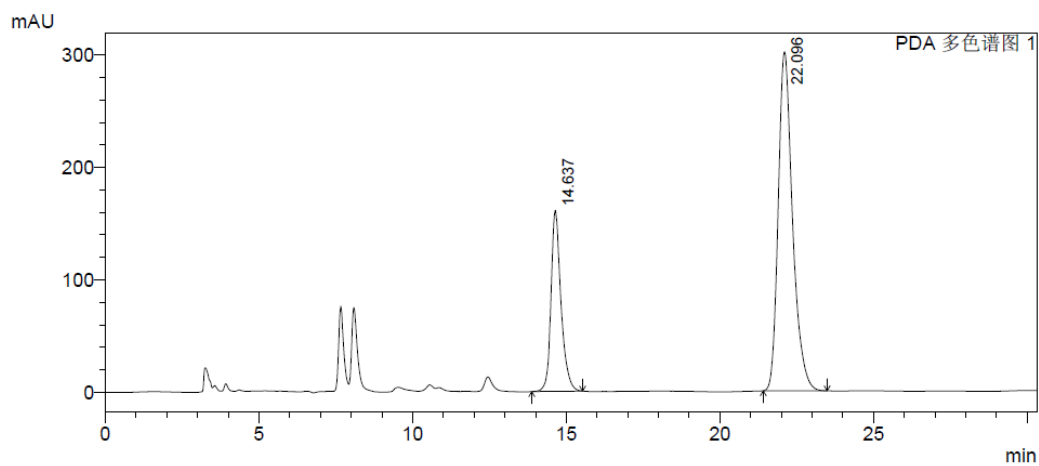

1 PDA 多色谱图 1/210nm 4nm

峰表

| 峰# | 保留时间   | 面积       | 高度     | 面积 %    | 高度 %    |
|----|--------|----------|--------|---------|---------|
| 1  | 14.637 | 3639831  | 161120 | 27.125  | 34.815  |
| 2  | 22.096 | 9779132  | 301673 | 72.875  | 65.185  |
| 总计 |        | 13418963 | 462793 | 100.000 | 100.000 |

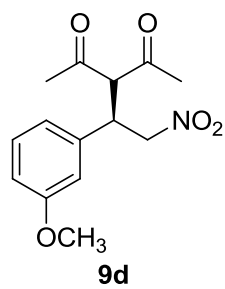

(Racemic)

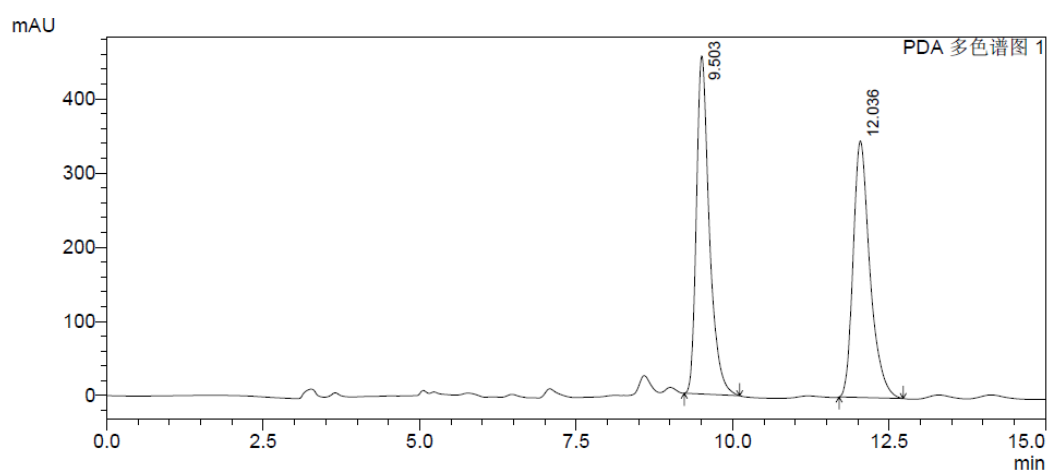

(Chiral)

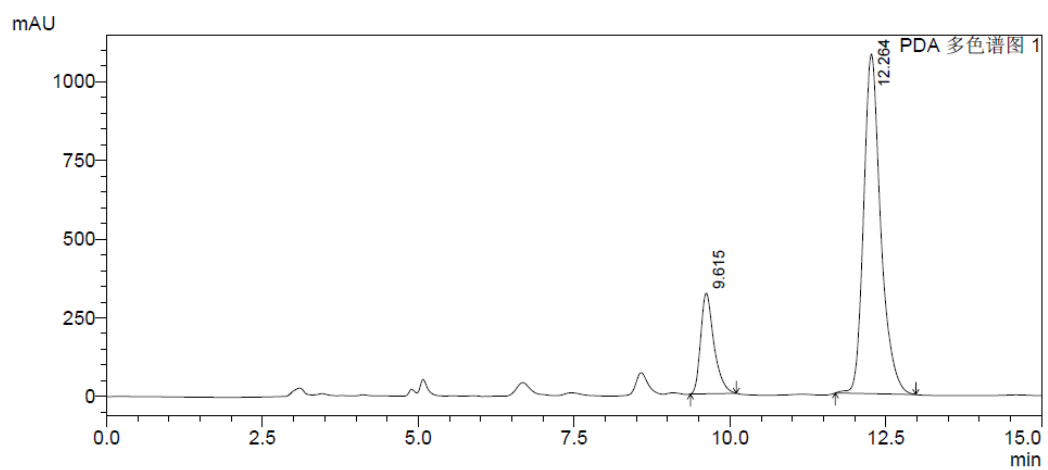

1 PDA 多色谱图 1/210nm 4nm

峰表

| PDA Ch1 210nm 4nm |        |          |         |         |         |
|-------------------|--------|----------|---------|---------|---------|
| 峰#                | 保留时间   | 面积       | 高度      | 面积 %    | 高度 %    |
| 1                 | 9.615  | 4735510  | 320163  | 18.679  | 22.867  |
| 2                 | 12.264 | 20616832 | 1079926 | 81.321  | 77.133  |
| 总计                |        | 25352342 | 1400089 | 100.000 | 100.000 |

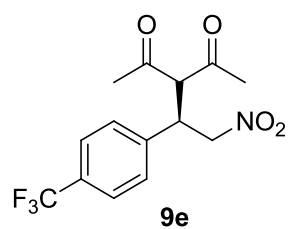

(Racemic)

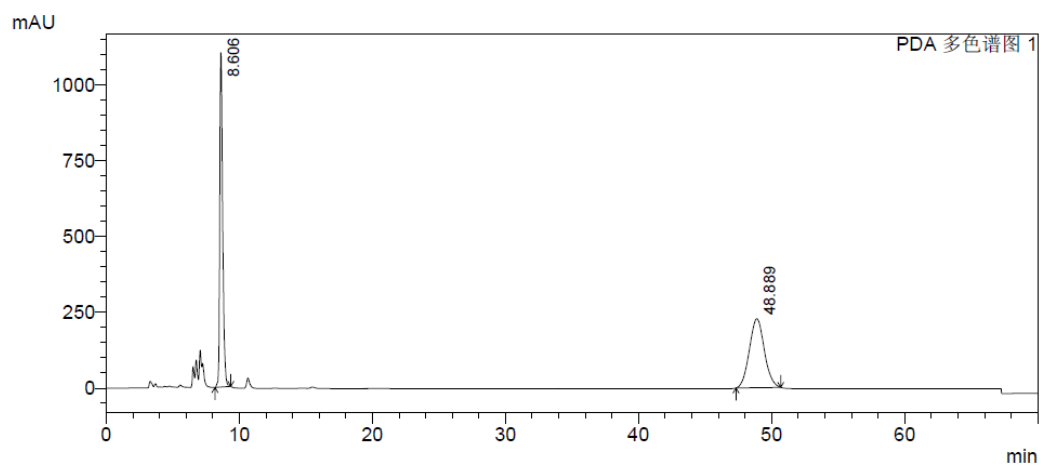

(Chiral)

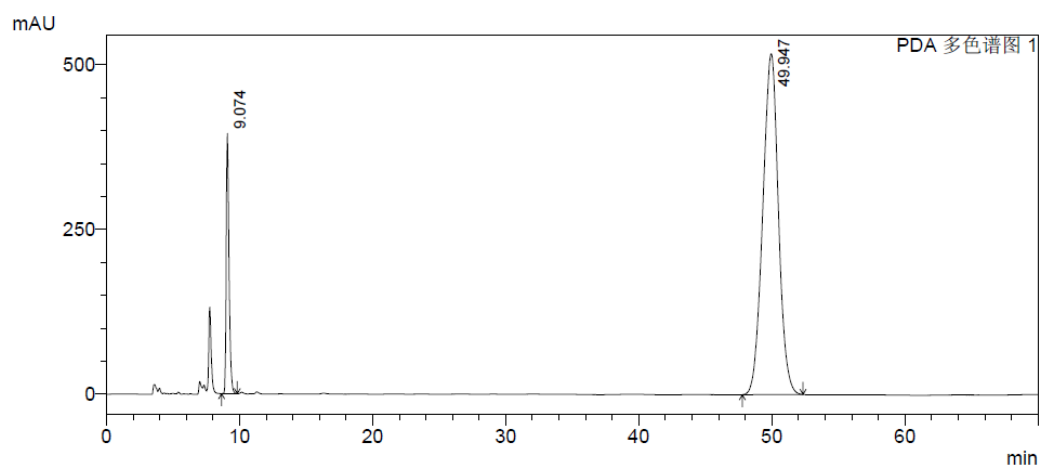

1 PDA 多色谱图 1/210nm 4nm

峰表

| 峰# | 保留时间   | 面积       | 高度     | 面积 %    | 高度 %    |
|----|--------|----------|--------|---------|---------|
| 1  | 9.074  | 5809439  | 395093 | 12.060  | 43.290  |
| 2  | 49.947 | 42360578 | 517567 | 87.940  | 56.710  |
| 总计 |        | 48170016 | 912659 | 100.000 | 100.000 |



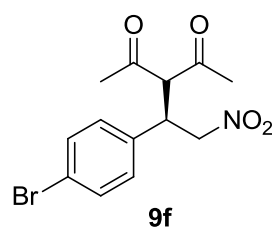

(Racemic)

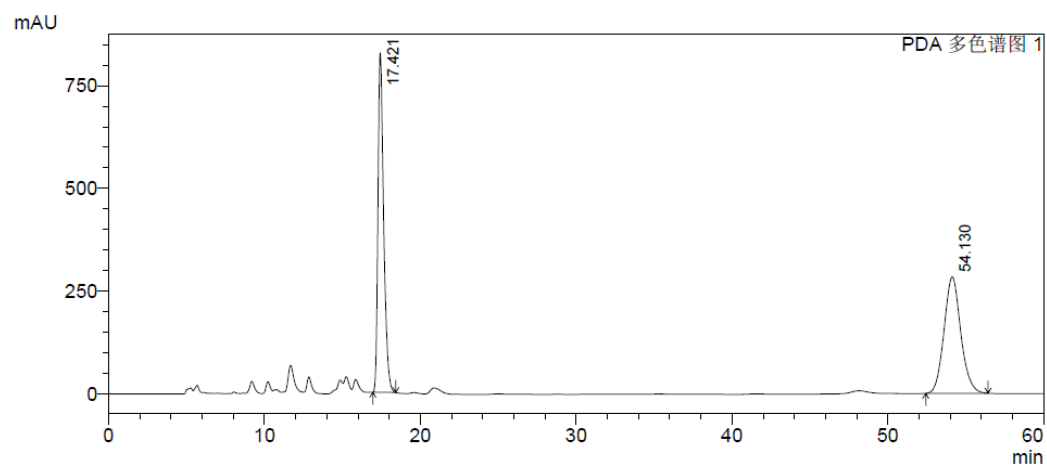

(Chiral)

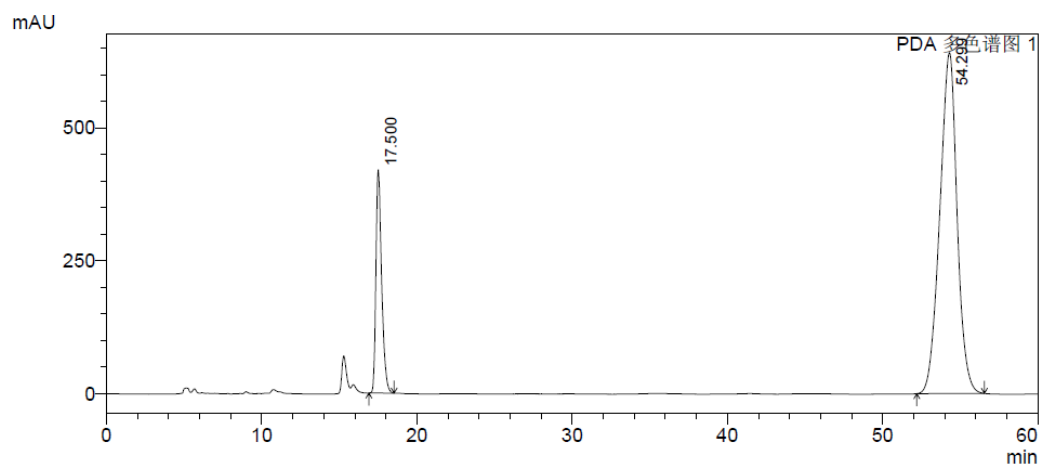

1 PDA 多色谱图 1/210nm 4nm

峰表

| 峰# | 保留时间   | 面积       | 高度      | 面积 %    | 高度 %    |
|----|--------|----------|---------|---------|---------|
| 1  | 17.500 | 10770979 | 420431  | 17.834  | 39.571  |
| 2  | 54.299 | 49624893 | 642041  | 82.166  | 60.429  |
| 总计 |        | 60395872 | 1062472 | 100.000 | 100.000 |

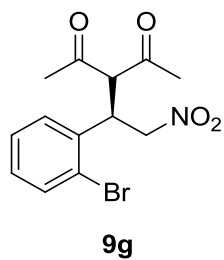

(Racemic)

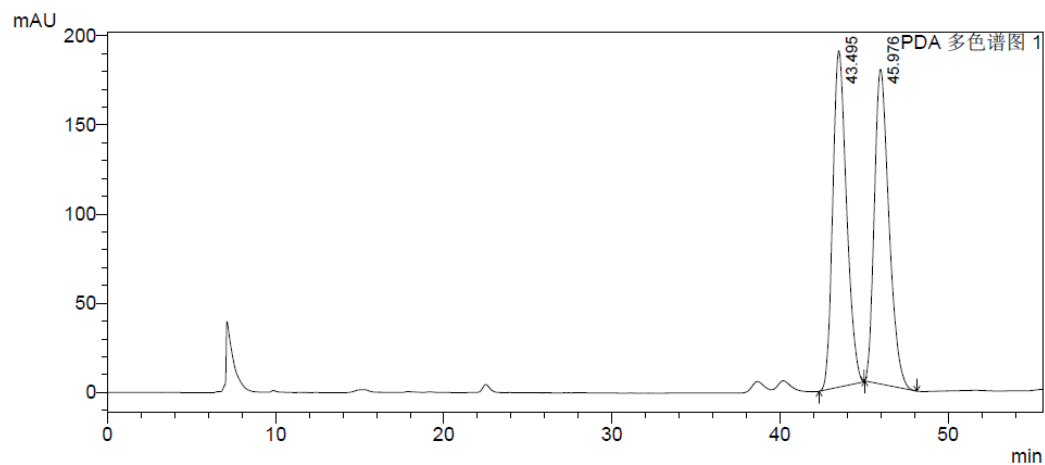

(Chiral)

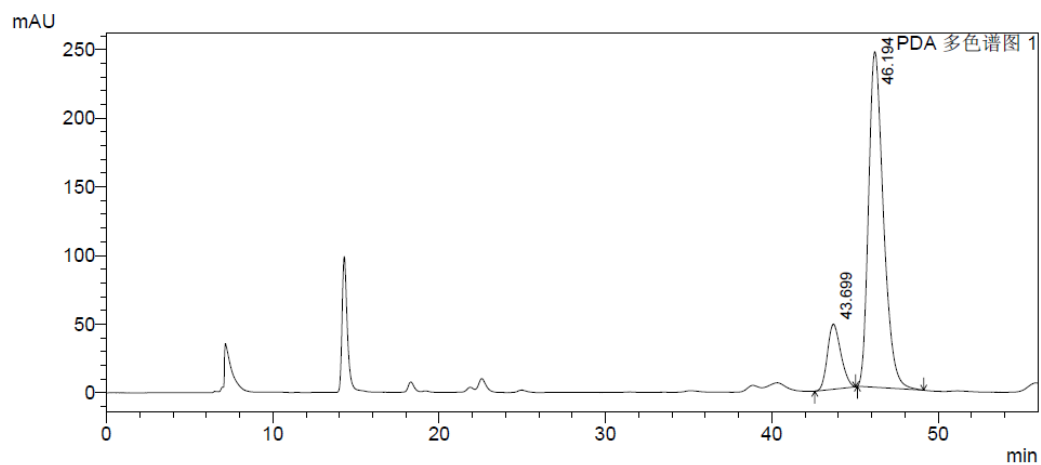

1 PDA 多色谱图 1/210nm 4nm

峰表

| PDA Ch1 210nm 4nm |        |          |        |         |         |
|-------------------|--------|----------|--------|---------|---------|
| 峰#                | 保留时间   | 面积       | 高度     | 面积 %    | 高度 %    |
| 1                 | 43.699 | 2648025  | 47438  | 14.857  | 16.254  |
| 2                 | 46.194 | 15174997 | 244416 | 85.143  | 83.746  |
| 总计                |        | 17823023 | 291854 | 100.000 | 100.000 |

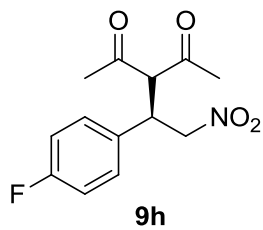

(Racemic)

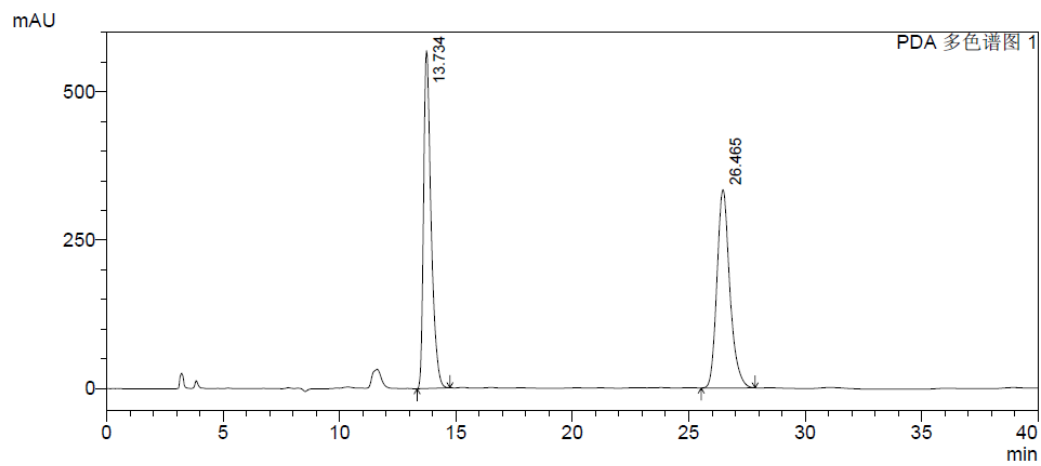

(Chiral)

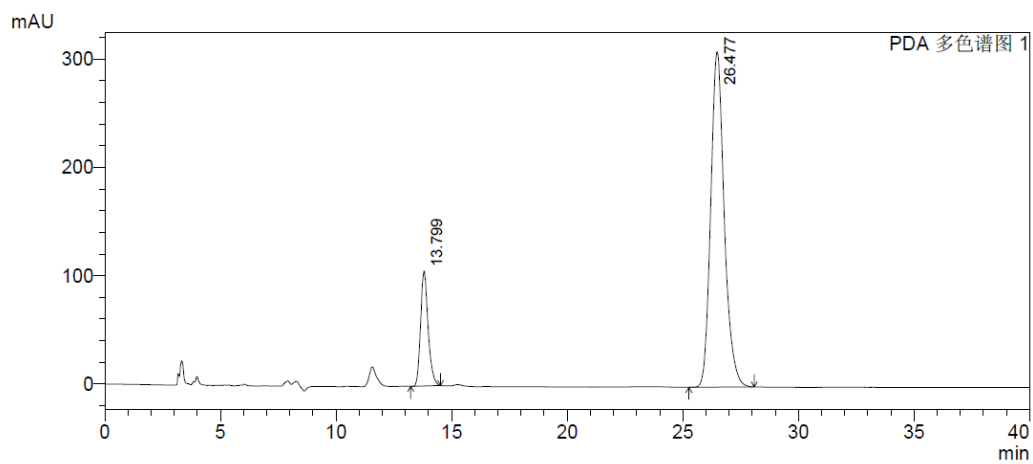

1 PDA 多色谱图 1/210nm 4nm

峰表

| 峰# | 保留时间   | 面积       | 高度     | 面积 %    | 高度 %    |
|----|--------|----------|--------|---------|---------|
| 1  | 13.799 | 2401325  | 106232 | 15.999  | 25.537  |
| 2  | 26.477 | 12608096 | 309763 | 84.001  | 74.463  |
| 总计 |        | 15009422 | 415995 | 100.000 | 100.000 |

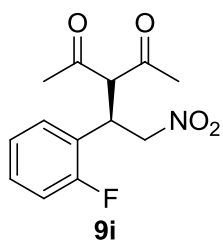

(Racemic)

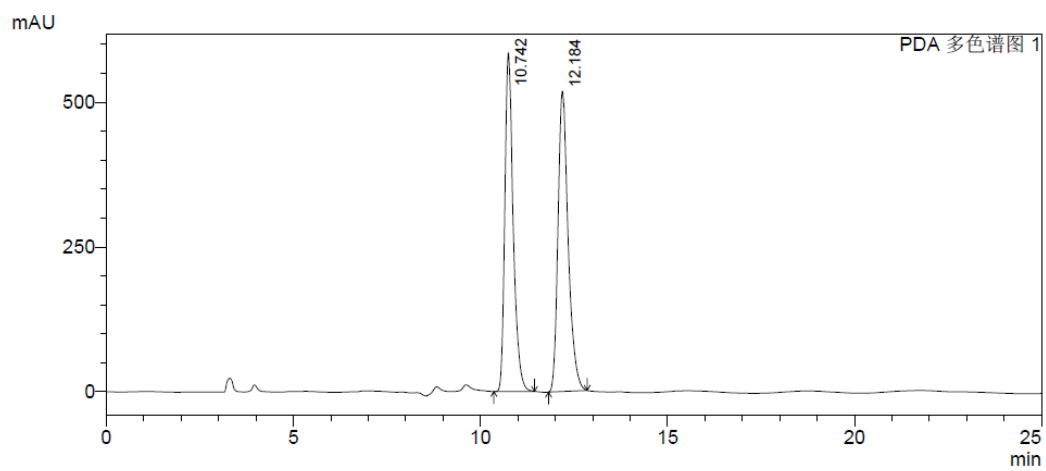

(Chiral)

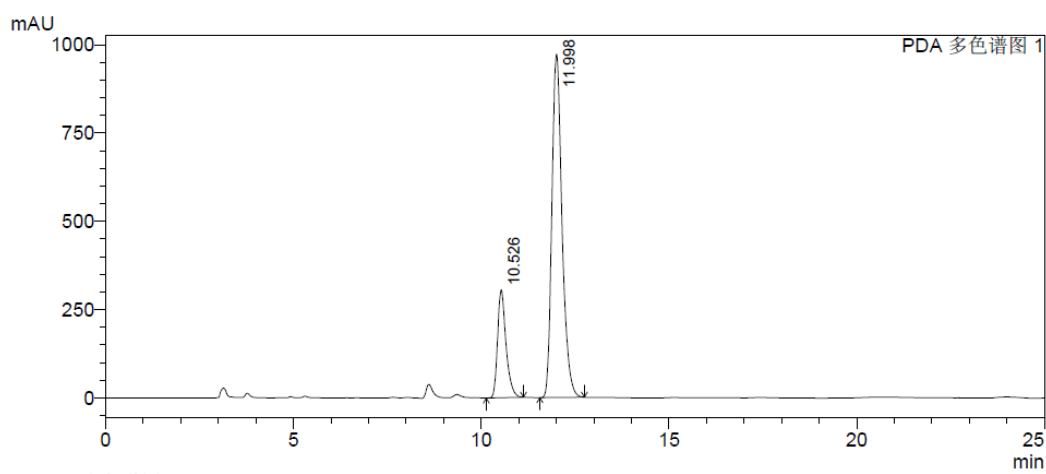

1 PDA 多色谱图 1/210nm 4nm

峰表

| PDA Ch1 210nm 4nm |        |          |         |         |         |
|-------------------|--------|----------|---------|---------|---------|
| 峰#                | 保留时间   | 面积       | 高度      | 面积 %    | 高度 %    |
| 1                 | 10.526 | 4765876  | 305868  | 20.650  | 23.933  |
| 2                 | 11.998 | 18313815 | 972140  | 79.350  | 76.067  |
| 总计                |        | 23079691 | 1278008 | 100.000 | 100.000 |

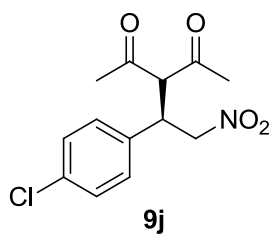

(Racemic)

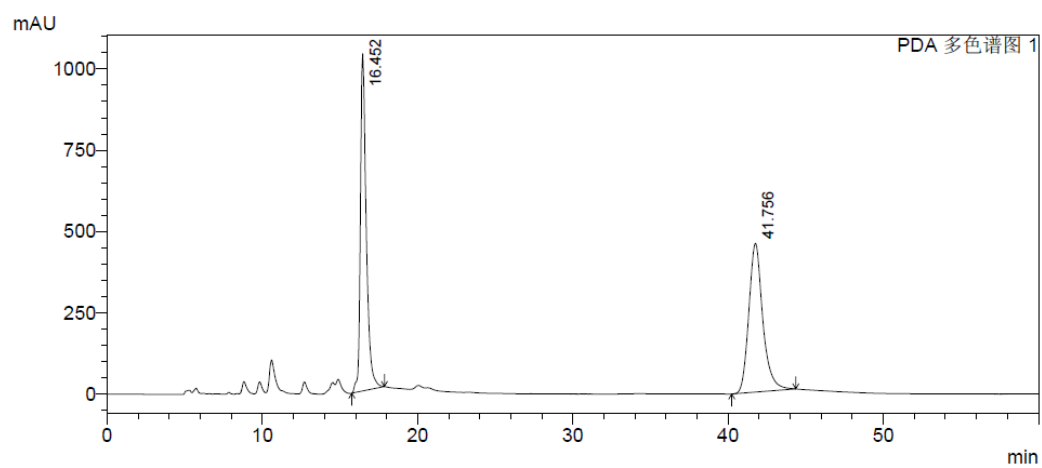

(Chiral)

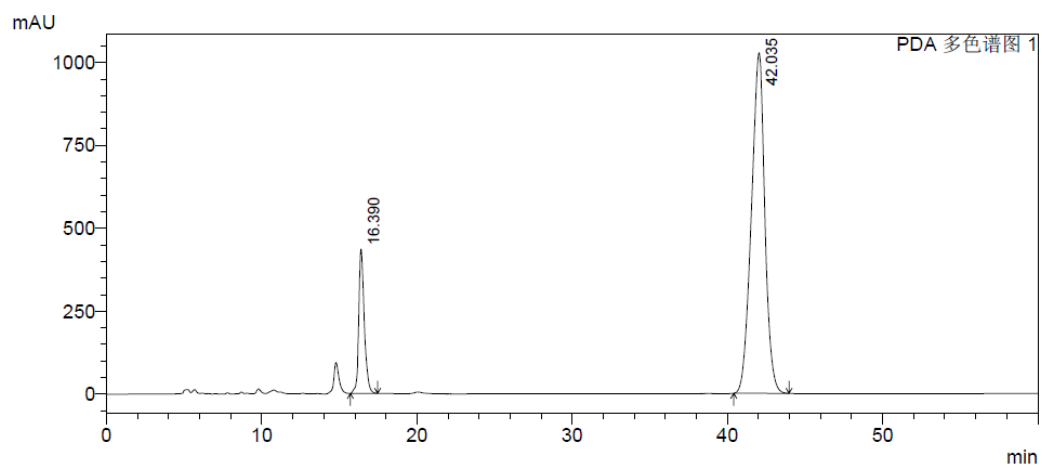

1 PDA 多色谱图 1/210nm 4nm

峰表

| 峰# | 保留时间   | 面积       | 高度      | 面积 %    | 高度 %    |
|----|--------|----------|---------|---------|---------|
| 1  | 16.390 | 10772952 | 435053  | 14.824  | 29.753  |
| 2  | 42.035 | 61899906 | 1027173 | 85.176  | 70.247  |
| 总计 |        | 72672858 | 1462226 | 100.000 | 100.000 |

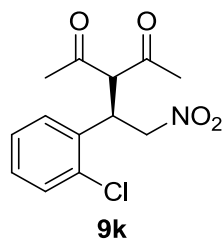

(Racemic)

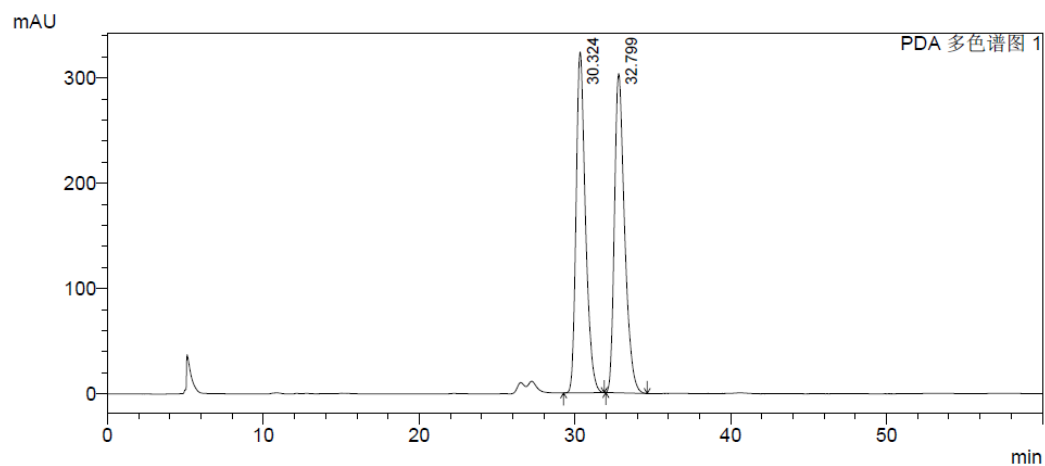

(Chiral)

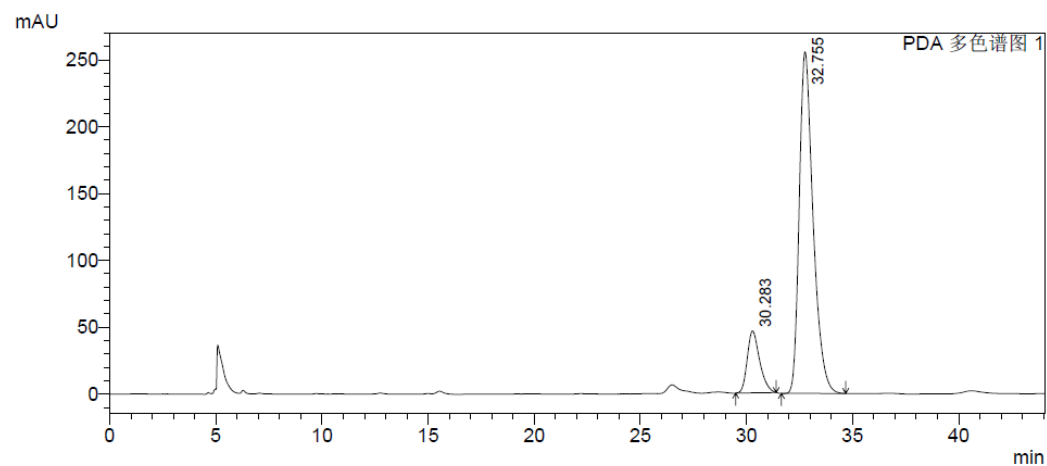

1 PDA 多色谱图 1/210nm 4nm

峰表

| 峰# | 保留时间   | 面积       | 高度     | 面积 %    | 高度 %    |
|----|--------|----------|--------|---------|---------|
| 1  | 30.283 | 1879169  | 46314  | 13.942  | 15.340  |
| 2  | 32.755 | 11599093 | 255600 | 86.058  | 84.660  |
| 总计 |        | 13478262 | 301914 | 100.000 | 100.000 |

## 7. References

1. Amarasinghe, N. R.; Turner, P.; Todd, M. H. *Adv. Synth. Catal.* **2012**, *354*, 2954-2958.
2. Li, Z. Y.; Ma, J. J.; Chen, J. W.; Pan, Y.; Jiang, J. L.; Wang, L. Y. *Chinese J. Chem.* **2009**, *27*, 2031-2036.
3. Durmaz, M.; Tataroglu, A.; Yilmaz, H.; Sirit, A. *Tetrahedron-Asymmetr* **2016**, *27*, 148-156.
4. Dong, Z.; Qiu, G. F.; Zhou, H. B.; Dong, C. N. *Tetrahedron-Asymmetr* **2012**, *23*, 1550-1556.
5. Ren, X.; He, C.; Feng, Y.; Chai, Y.; Yao, W.; Chen, W.; Zhang, S. *Org. Biomol. Chem.* **2015**, *13*, 5054-5060.
